# Supplementary material for: Differential proteomic profiling reveals regulatory proteins and novel links between primary metabolism and spinosad production in Saccharopolyspora spinosa
Source: PubMed Central journal article supplement (PMC3936707; doi:10.1186/1475-2859-13-27), 2014-02-21
Supplement: 1475-2859-13-27-S3.pdf [file 1475-2859-13-27-S3.pdf]

## Additional file 1:

### Supplementary tables

**Table S1** The ratios of the total PAI per protein between replicate time phases

| NCBI<br>Accession | PAI value in<br>biological replicate 1 |       |      |      | $\Sigma PAI_{BR1}^a$ | PAI value in<br>biological replicate 2 |       |      |      | $\Sigma PAI_{BR2}^b$ | Ratio $\Sigma PAI_{BR1/BR2}$ |
|-------------------|----------------------------------------|-------|------|------|----------------------|----------------------------------------|-------|------|------|----------------------|------------------------------|
|                   | Time phases                            | T1    | T2   | T3   |                      | T4                                     | T1    | T2   | T3   |                      |                              |
| gi348173102       | 3.86                                   | 3.83  | 0.82 | 0.34 | 8.85                 | 4.35                                   | 4.20  | 0.73 | 0.40 | 9.68                 | 0.91                         |
| gi348173178       | 10.78                                  | 8.70  | 5.56 | 8.44 | 33.48                | 8.70                                   | 10.22 | 4.52 | 6.59 | 30.04                | 1.11                         |
| gi348176726       | 10.43                                  | 41.26 | 7.04 | 3.09 | 61.83                | 11.09                                  | 56.09 | 8.26 | 3.35 | 78.78                | 0.78                         |
| gi348176428       | 1.74                                   | 2.51  | 0.77 | 0.58 | 5.60                 | 1.86                                   | 2.71  | 1.03 | 0.68 | 6.27                 | 0.89                         |
| gi348174902       | 3.00                                   | 5.17  | 2.98 | 0.81 | 11.95                | 2.83                                   | 5.79  | 1.95 | 0.93 | 11.50                | 1.04                         |
| gi348170321       | 0.78                                   | 1.36  | 0.62 | 0.40 | 3.16                 | 0.69                                   | 1.42  | 0.47 | 0.44 | 3.02                 | 1.05                         |
| gi348173691       | 8.75                                   | 4.67  | 2.42 | 0.75 | 16.58                | 8.50                                   | 11.00 | 1.83 | 0.50 | 21.83                | 0.76                         |
| gi348169092       | 1.20                                   | 1.08  | 0.23 | 0.18 | 2.69                 | 1.30                                   | 0.90  | 0.20 | 0.24 | 2.64                 | 1.02                         |
| gi348173083       | 2.68                                   | 3.58  | 0.74 | 0.52 | 7.52                 | 2.32                                   | 5.00  | 0.90 | 0.52 | 8.74                 | 0.86                         |
| gi348170335       | 3.81                                   | 3.05  | 0.48 | 0.19 | 7.52                 | 4.00                                   | 2.76  | 0.52 | 0.24 | 7.52                 | 1.00                         |
| gi348175327       | 2.57                                   | 3.70  | 4.10 | 5.10 | 15.47                | 3.03                                   | 3.63  | 5.07 | 4.60 | 16.33                | 0.95                         |
| gi348176809       | 2.88                                   | 0.88  | ND   | ND   | 3.77                 | 2.58                                   | 0.73  | ND   | ND   | 3.31                 | 1.14                         |
| gi348169183       | 3.95                                   | 0.74  | 0.37 | ND   | 5.05                 | 5.53                                   | 0.95  | 0.58 | ND   | 7.05                 | 0.72                         |
| gi348169918       | 4.38                                   | 2.50  | 0.69 | 0.63 | 8.19                 | 4.06                                   | 2.06  | 0.81 | 0.25 | 7.19                 | 1.14                         |
| gi348171102       | 0.63                                   | 0.51  | 0.23 | 0.08 | 1.45                 | 0.31                                   | 0.73  | 0.21 | 0.06 | 1.32                 | 1.09                         |
| gi348176429       | 0.46                                   | 0.40  | 0.03 | 0.01 | 0.91                 | 0.34                                   | 0.52  | 0.03 | 0.01 | 0.91                 | 1.00                         |
| gi348170197       | 0.47                                   | 0.39  | 0.15 | 0.08 | 1.09                 | 0.32                                   | 0.40  | 0.18 | 0.06 | 0.97                 | 1.13                         |
| gi348173100       | 3.94                                   | 1.41  | 0.18 | ND   | 5.53                 | 3.41                                   | 3.06  | 0.12 | ND   | 6.59                 | 0.84                         |

|             |      |      |      |      |       |      |       |      |      |       |      |
|-------------|------|------|------|------|-------|------|-------|------|------|-------|------|
| gi348174397 | 5.15 | 4.08 | 1.23 | 0.15 | 10.62 | 5.69 | 3.77  | 1.08 | 0.15 | 10.69 | 0.99 |
| gi348176887 | 0.81 | 1.01 | 0.75 | 0.37 | 2.94  | 0.83 | 0.80  | 0.70 | 0.24 | 2.57  | 1.15 |
| gi348171511 | 0.75 | 3.15 | 1.21 | 0.73 | 5.85  | 0.86 | 2.67  | 0.68 | 0.87 | 5.08  | 1.15 |
| gi348176808 | 0.52 | 0.51 | 0.11 | ND   | 1.13  | 0.57 | 0.50  | 0.11 | ND   | 1.19  | 0.95 |
| gi348173909 | 2.63 | 0.67 | ND   | ND   | 3.29  | 2.00 | 0.96  | ND   | ND   | 2.96  | 1.11 |
| gi348173006 | 0.26 | 0.17 | ND   | ND   | 0.42  | 0.29 | 0.24  | ND   | ND   | 0.53  | 0.80 |
| gi348171614 | 0.34 | 0.41 | 0.36 | 0.20 | 1.32  | 0.36 | 0.37  | 0.21 | 0.18 | 1.12  | 1.18 |
| gi348175422 | 1.00 | 1.48 | 0.24 | 0.07 | 2.79  | 0.91 | 1.38  | 0.29 | 0.14 | 2.72  | 1.03 |
| gi348176443 | 2.24 | 3.20 | 0.76 | 0.76 | 6.96  | 2.24 | 4.96  | 1.00 | 0.52 | 8.72  | 0.80 |
| gi348174563 | 0.64 | 1.51 | 0.51 | 0.08 | 2.74  | 0.87 | 2.14  | 0.47 | 0.02 | 3.51  | 0.78 |
| gi348176721 | 5.60 | 7.40 | ND   | ND   | 13.00 | 4.80 | 10.60 | ND   | ND   | 15.40 | 0.84 |
| gi348174019 | 0.81 | 0.68 | 0.19 | 0.12 | 1.80  | 0.78 | 0.96  | 0.23 | 0.17 | 2.14  | 0.84 |
| gi348170794 | 0.53 | 0.36 | 0.05 | ND   | 0.94  | 0.53 | 0.57  | 0.12 | ND   | 1.23  | 0.77 |
| gi41350153  | 0.46 | 0.73 | 0.64 | 0.57 | 2.40  | 0.42 | 0.71  | 0.47 | 0.49 | 2.08  | 1.15 |
| gi348169997 | 1.21 | 1.12 | 0.23 | ND   | 2.56  | 1.12 | 1.21  | 0.21 | ND   | 2.53  | 1.01 |
| gi348171612 | 1.70 | 1.00 | 0.20 | ND   | 2.90  | 1.63 | 1.00  | 0.27 | ND   | 2.90  | 1.00 |
| gi348174564 | 0.57 | 0.94 | 0.32 | 0.02 | 1.86  | 0.53 | 1.29  | 0.33 | 0.02 | 2.17  | 0.86 |
| gi348174411 | 0.71 | 0.68 | 0.19 | 0.20 | 1.78  | 0.74 | 0.52  | 0.19 | 0.26 | 1.71  | 1.04 |
| gi348176909 | 0.74 | 0.60 | ND   | ND   | 1.34  | 0.74 | 0.20  | ND   | ND   | 0.94  | 1.43 |
| gi348168964 | 0.18 | 0.19 | 0.07 | 0.01 | 0.45  | 0.17 | 0.18  | 0.05 | 0.03 | 0.44  | 1.02 |
| gi348172298 | 0.36 | 0.73 | 0.10 | 0.02 | 1.20  | 0.47 | 0.50  | 0.06 | 0.04 | 1.07  | 1.12 |
| gi348173515 | 0.68 | 0.42 | ND   | ND   | 1.11  | 0.45 | 0.42  | ND   | ND   | 0.88  | 1.26 |
| gi348173142 | 1.29 | 2.17 | ND   | ND   | 3.46  | 1.69 | 2.80  | ND   | ND   | 4.49  | 0.77 |
| gi348173305 | 0.67 | 0.84 | 0.41 | 0.05 | 1.97  | 0.75 | 0.66  | 0.44 | 0.09 | 1.94  | 1.02 |
| gi348174826 | 0.55 | 1.38 | 1.21 | 1.88 | 5.01  | 0.66 | 1.31  | 1.90 | 1.65 | 5.52  | 0.91 |

|             |      |      |      |      |      |      |      |      |      |      |      |
|-------------|------|------|------|------|------|------|------|------|------|------|------|
| gi348169301 | 0.59 | 0.45 | 0.17 | ND   | 1.22 | 0.49 | 0.51 | 0.12 | ND   | 1.12 | 1.09 |
| gi348176933 | 0.37 | 0.08 | 0.04 | ND   | 0.50 | 0.40 | 0.09 | 0.03 | ND   | 0.52 | 0.95 |
| gi348172504 | 0.68 | 1.02 | 0.14 | ND   | 1.83 | 0.66 | 0.63 | 0.07 | ND   | 1.36 | 1.35 |
| gi348170152 | 1.29 | 1.94 | 0.26 | ND   | 3.48 | 0.97 | 1.97 | 0.10 | ND   | 3.03 | 1.15 |
| gi348175715 | 0.68 | 1.00 | 0.09 | ND   | 1.77 | 0.79 | 0.84 | 0.09 | ND   | 1.71 | 1.03 |
| gi348174864 | 2.64 | 1.64 | 0.86 | 0.36 | 5.50 | 2.21 | 2.71 | 1.29 | 0.64 | 6.86 | 0.80 |
| gi348174687 | 0.38 | 1.27 | 0.54 | 0.08 | 2.27 | 0.48 | 1.29 | 0.62 | 0.10 | 2.49 | 0.91 |
| gi348172972 | 0.90 | 0.71 | 0.32 | 0.20 | 2.12 | 0.93 | 1.07 | 0.20 | 0.17 | 2.37 | 0.90 |
| gi348175040 | 0.71 | 0.71 | 0.31 | 0.18 | 1.90 | 0.69 | 0.63 | 0.25 | 0.18 | 1.75 | 1.09 |
| gi348171742 | 0.40 | 0.25 | 0.13 | ND   | 0.78 | 0.46 | 0.31 | 0.09 | ND   | 0.86 | 0.91 |
| gi348176468 | 1.26 | 1.22 | 0.33 | ND   | 2.81 | 1.56 | 0.81 | 0.33 | ND   | 2.70 | 1.04 |
| gi290543607 | 0.68 | ND   | 0.04 | ND   | 0.72 | 0.54 | ND   | 0.04 | ND   | 0.58 | 1.24 |
| gi348176851 | 1.89 | 1.83 | 0.83 | 0.28 | 4.83 | 1.39 | 3.00 | 1.00 | 0.22 | 5.61 | 0.86 |
| gi348174074 | 0.79 | 2.95 | 2.65 | 1.53 | 7.93 | 0.60 | 2.81 | 1.79 | 1.21 | 6.42 | 1.24 |
| gi348176475 | 0.70 | 0.34 | 0.34 | 0.09 | 1.47 | 0.74 | 0.43 | 0.17 | 0.17 | 1.51 | 0.97 |
| gi348176895 | 0.49 | 0.31 | 0.21 | 0.06 | 1.07 | 0.57 | 0.45 | 0.10 | 0.04 | 1.16 | 0.92 |
| gi348169779 | 0.45 | 0.70 | 0.10 | ND   | 1.25 | 0.45 | 0.63 | 0.12 | ND   | 1.21 | 1.03 |
| gi348170208 | 0.79 | 0.93 | 1.10 | 0.86 | 3.67 | 0.71 | 1.14 | 0.90 | 1.00 | 3.76 | 0.97 |
| gi348170176 | 0.85 | 0.69 | 0.10 | ND   | 1.64 | 0.62 | 0.56 | 0.38 | ND   | 1.56 | 1.05 |
| gi348169193 | 0.56 | 0.37 | 0.04 | 0.12 | 1.09 | 0.60 | 0.74 | 0.07 | 0.09 | 1.49 | 0.73 |
| gi348171262 | 0.62 | 0.69 | 0.42 | 0.38 | 2.12 | 0.71 | 0.83 | 0.46 | 0.25 | 2.25 | 0.94 |
| gi348171433 | 0.25 | 0.11 | 0.13 | 0.17 | 0.65 | 0.25 | 0.15 | 0.10 | 0.08 | 0.57 | 1.14 |
| gi348170186 | 0.25 | 0.33 | 0.02 | ND   | 0.60 | 0.23 | 0.32 | 0.03 | ND   | 0.58 | 1.03 |
| gi348173300 | 0.66 | 0.73 | 0.09 | ND   | 1.48 | 0.61 | 0.77 | 0.07 | ND   | 1.45 | 1.02 |
| gi348176452 | 0.11 | 0.13 | 0.05 | 0.03 | 0.33 | 0.08 | 0.06 | 0.02 | 0.05 | 0.22 | 1.49 |

|             |      |      |      |      |      |      |      |      |      |      |      |
|-------------|------|------|------|------|------|------|------|------|------|------|------|
| gi348173307 | 0.65 | 1.12 | 0.67 | 0.14 | 2.58 | 0.67 | 1.09 | 0.67 | 0.05 | 2.49 | 1.04 |
| gi348174969 | 0.45 | 0.32 | ND   | ND   | 0.77 | 0.42 | 0.40 | ND   | ND   | 0.82 | 0.94 |
| gi348171500 | 0.36 | 0.78 | 0.34 | 0.26 | 1.74 | 0.42 | 0.95 | 0.50 | 0.50 | 2.36 | 0.74 |
| gi348174688 | 0.54 | 1.10 | 0.42 | 0.04 | 2.10 | 0.48 | 0.74 | 0.26 | 0.04 | 1.52 | 1.38 |
| gi348170524 | 1.50 | 1.56 | ND   | 0.22 | 3.28 | 1.61 | 1.22 | ND   | 0.17 | 3.00 | 1.09 |
| gi348169435 | 0.77 | 1.66 | ND   | ND   | 2.43 | 0.46 | 2.49 | ND   | ND   | 2.94 | 0.83 |
| gi348176451 | 0.08 | 0.07 | ND   | ND   | 0.15 | 0.07 | 0.03 | ND   | ND   | 0.11 | 1.39 |
| gi348176729 | 0.27 | 0.27 | 0.06 | 0.03 | 0.64 | 0.35 | 0.16 | 0.04 | 0.06 | 0.61 | 1.05 |
| gi348175423 | 0.46 | 0.82 | 0.29 | 0.09 | 1.66 | 0.30 | 0.68 | 0.30 | 0.20 | 1.48 | 1.12 |
| gi348170005 | 0.22 | 0.23 | 0.08 | 0.03 | 0.56 | 0.13 | 0.29 | 0.05 | 0.03 | 0.50 | 1.13 |
| gi348175295 | 0.43 | 0.48 | 0.34 | 0.33 | 1.59 | 0.38 | 0.41 | 0.57 | 0.24 | 1.60 | 0.99 |
| gi348169090 | 0.22 | 0.32 | 0.12 | 0.10 | 0.75 | 0.29 | 0.23 | 0.09 | 0.06 | 0.67 | 1.12 |
| gi348174424 | 0.29 | 0.23 | ND   | ND   | 0.52 | 0.27 | 0.22 | ND   | ND   | 0.48 | 1.08 |
| gi348174689 | 0.55 | 1.00 | 0.09 | ND   | 1.64 | 0.77 | 1.14 | 0.05 | ND   | 1.95 | 0.84 |
| gi348169412 | 0.17 | 0.22 | 0.13 | 0.03 | 0.56 | 0.17 | 0.12 | 0.06 | 0.05 | 0.40 | 1.40 |
| gi348172319 | 3.43 | 2.00 | 0.43 | ND   | 5.86 | 4.14 | 2.00 | 1.43 | ND   | 7.57 | 0.77 |
| gi348169077 | 0.13 | 0.10 | ND   | ND   | 0.23 | 0.07 | 0.08 | ND   | ND   | 0.16 | 1.47 |
| gi348170709 | 0.19 | 0.12 | ND   | ND   | 0.31 | 0.21 | 0.10 | ND   | ND   | 0.30 | 1.03 |
| gi348176409 | 0.41 | 0.34 | 0.07 | ND   | 0.81 | 0.49 | 0.42 | 0.10 | ND   | 1.02 | 0.80 |
| gi348171389 | 1.15 | 0.35 | ND   | ND   | 1.50 | 1.60 | 0.30 | ND   | ND   | 1.90 | 0.79 |
| gi348173043 | 2.09 | 1.55 | 1.55 | 0.36 | 5.55 | 1.64 | 1.55 | 0.73 | 0.55 | 4.45 | 1.24 |
| gi348171450 | 0.27 | 0.46 | 0.20 | 0.07 | 1.00 | 0.32 | 0.33 | 0.18 | 0.05 | 0.88 | 1.14 |
| gi348170177 | 0.49 | 0.20 | 0.04 | 0.07 | 0.80 | 0.49 | 0.62 | 0.04 | 0.04 | 1.20 | 0.67 |
| gi348176425 | 0.37 | 0.13 | 0.05 | ND   | 0.55 | 0.23 | 0.20 | 0.07 | ND   | 0.50 | 1.10 |
| gi348176852 | 1.17 | 1.67 | 2.56 | 0.89 | 6.28 | 1.17 | 2.11 | 1.83 | 1.00 | 6.11 | 1.03 |

|             |      |      |      |      |      |      |      |      |      |      |      |
|-------------|------|------|------|------|------|------|------|------|------|------|------|
| gi348171558 | 1.17 | 2.28 | 1.17 | 0.50 | 5.11 | 1.17 | 1.89 | 1.50 | 0.44 | 5.00 | 1.02 |
| gi348174006 | 0.21 | 0.19 | ND   | ND   | 0.40 | 0.25 | 0.29 | ND   | ND   | 0.55 | 0.73 |
| gi348169302 | 0.27 | 0.32 | 0.08 | ND   | 0.67 | 0.21 | 0.36 | 0.05 | ND   | 0.63 | 1.06 |
| gi348176762 | 0.25 | 0.18 | 0.04 | 0.04 | 0.51 | 0.27 | 0.23 | 0.05 | 0.06 | 0.61 | 0.83 |
| gi348170205 | 0.30 | 0.60 | 0.21 | 0.24 | 1.34 | 0.13 | 0.33 | 0.16 | 0.21 | 0.84 | 1.61 |
| gi348170064 | 0.51 | 0.95 | 1.41 | 1.24 | 4.11 | 0.46 | 0.62 | 0.78 | 1.03 | 2.89 | 1.42 |
| gi348176508 | 0.08 | 0.09 | 0.02 | ND   | 0.18 | 0.11 | 0.06 | 0.02 | ND   | 0.19 | 0.94 |
| gi348169195 | 0.22 | 0.23 | ND   | ND   | 0.44 | 0.25 | 0.10 | ND   | ND   | 0.35 | 1.26 |
| gi348176430 | 0.31 | 0.13 | 0.06 | ND   | 0.50 | 0.32 | 0.06 | 0.08 | ND   | 0.47 | 1.07 |
| gi348173189 | 0.33 | 0.42 | ND   | ND   | 0.75 | 0.35 | 0.23 | ND   | ND   | 0.58 | 1.30 |
| gi348171651 | 0.73 | 0.38 | 0.12 | ND   | 1.23 | 0.73 | 0.65 | 0.12 | ND   | 1.50 | 0.82 |
| gi348172112 | 0.10 | 0.06 | ND   | ND   | 0.16 | 0.06 | 0.03 | ND   | ND   | 0.09 | 1.75 |
| gi348171813 | 0.43 | 0.38 | 0.38 | 0.31 | 1.50 | 0.36 | 0.60 | 0.43 | 0.38 | 1.76 | 0.85 |
| gi348176722 | 0.78 | 1.13 | 0.17 | ND   | 2.09 | 0.65 | 1.30 | 0.35 | ND   | 2.30 | 0.91 |
| gi348172782 | 0.69 | 1.00 | 0.12 | ND   | 1.81 | 0.46 | 0.92 | 0.08 | ND   | 1.46 | 1.24 |
| gi348171928 | 0.67 | 0.22 | 0.30 | ND   | 1.19 | 0.59 | 0.93 | 0.22 | ND   | 1.74 | 0.68 |
| gi348173521 | 0.42 | 0.14 | ND   | ND   | 0.56 | 0.40 | 0.16 | ND   | ND   | 0.56 | 1.00 |
| gi348169429 | 0.32 | 0.39 | 0.05 | 0.09 | 0.84 | 0.30 | 0.67 | 0.07 | 0.04 | 1.07 | 0.79 |
| gi348176397 | 0.27 | 0.21 | 0.05 | ND   | 0.52 | 0.29 | 0.10 | 0.08 | ND   | 0.46 | 1.14 |
| gi348175373 | 0.47 | 1.06 | 1.25 | 1.81 | 4.58 | 0.47 | 0.89 | 0.92 | 1.81 | 4.08 | 1.12 |
| gi348174207 | 0.13 | 0.11 | 0.05 | 0.02 | 0.30 | 0.14 | 0.11 | 0.02 | 0.02 | 0.29 | 1.05 |
| gi348176831 | 0.15 | 0.04 | 0.13 | 0.10 | 0.42 | 0.09 | 0.04 | 0.13 | 0.11 | 0.36 | 1.18 |
| gi348176412 | 0.35 | 0.25 | 0.04 | ND   | 0.65 | 0.35 | 0.33 | 0.21 | ND   | 0.90 | 0.72 |
| gi348169513 | 0.21 | 0.45 | ND   | ND   | 0.66 | 0.20 | 0.32 | ND   | ND   | 0.51 | 1.29 |
| gi348176396 | 0.25 | 0.17 | 0.09 | 0.07 | 0.58 | 0.23 | 0.12 | 0.03 | 0.04 | 0.42 | 1.38 |

|             |      |      |      |      |      |      |      |      |      |      |      |
|-------------|------|------|------|------|------|------|------|------|------|------|------|
| gi348169208 | 0.19 | 0.20 | 0.07 | 0.15 | 0.61 | 0.12 | 0.21 | 0.18 | 0.16 | 0.67 | 0.90 |
| gi348176399 | 0.29 | 0.09 | ND   | ND   | 0.38 | 0.24 | 0.16 | ND   | ND   | 0.40 | 0.95 |
| gi348170217 | 0.29 | 0.33 | 0.22 | 0.42 | 1.25 | 0.25 | 0.27 | 0.18 | 0.49 | 1.20 | 1.05 |
| gi348173538 | 0.19 | 0.08 | ND   | 0.02 | 0.30 | 0.07 | 0.13 | ND   | 0.02 | 0.23 | 1.32 |
| gi348176424 | 0.52 | 0.06 | ND   | ND   | 0.58 | 0.42 | 0.65 | ND   | ND   | 1.06 | 0.55 |
| gi348171298 | 0.36 | 0.61 | 0.50 | 0.55 | 2.02 | 0.23 | 0.91 | 0.32 | 0.73 | 2.18 | 0.93 |
| gi348171293 | 0.21 | ND   | 0.11 | 0.04 | 0.36 | 0.18 | ND   | 0.08 | 0.03 | 0.29 | 1.24 |
| gi348174297 | 0.23 | 0.11 | 0.06 | ND   | 0.39 | 0.33 | 0.11 | 0.09 | ND   | 0.53 | 0.74 |
| gi348170589 | 0.15 | 0.22 | 0.08 | 0.04 | 0.49 | 0.16 | 0.25 | 0.05 | 0.07 | 0.53 | 0.92 |
| gi348176682 | 0.16 | 0.41 | 0.02 | 0.05 | 0.64 | 0.16 | 0.24 | 0.03 | 0.09 | 0.53 | 1.20 |
| gi348174426 | 0.23 | 0.13 | ND   | ND   | 0.37 | 0.28 | 0.25 | ND   | ND   | 0.53 | 0.69 |
| gi348172413 | 0.39 | 0.06 | ND   | ND   | 0.44 | 0.11 | 0.06 | ND   | ND   | 0.17 | 2.67 |
| gi348176208 | 0.34 | 0.49 | 0.93 | 0.73 | 2.49 | 0.34 | 0.78 | 0.51 | 0.80 | 2.44 | 1.02 |
| gi348174802 | 0.16 | 0.10 | ND   | ND   | 0.27 | 0.10 | 0.05 | ND   | ND   | 0.15 | 1.77 |
| gi348169164 | 0.37 | 0.21 | 0.05 | ND   | 0.63 | 0.37 | 0.26 | 0.08 | ND   | 0.71 | 0.89 |
| gi348170647 | 0.17 | 0.16 | 0.05 | ND   | 0.38 | 0.17 | 0.11 | 0.06 | ND   | 0.35 | 1.11 |
| gi348176422 | 0.37 | 0.11 | 0.09 | ND   | 0.57 | 0.09 | 0.29 | 0.11 | ND   | 0.49 | 1.18 |
| gi348173113 | 0.11 | ND   | ND   | ND   | 0.11 | 0.11 | ND   | ND   | ND   | 0.11 | 1.00 |
| gi348174007 | 0.15 | 0.06 | ND   | ND   | 0.21 | 0.08 | 0.06 | ND   | ND   | 0.14 | 1.50 |
| gi348176674 | 0.20 | 0.08 | ND   | ND   | 0.28 | 0.23 | 0.16 | ND   | ND   | 0.39 | 0.72 |
| gi348175334 | 0.38 | 0.15 | 0.09 | ND   | 0.62 | 0.24 | 0.50 | 0.06 | ND   | 0.79 | 0.78 |
| gi348171442 | 0.15 | 0.19 | ND   | ND   | 0.34 | 0.09 | 0.17 | ND   | ND   | 0.27 | 1.26 |
| gi348174565 | 0.21 | 0.13 | ND   | ND   | 0.33 | 0.08 | 0.06 | ND   | ND   | 0.14 | 2.33 |
| gi348173201 | 0.16 | ND   | ND   | ND   | 0.16 | 0.17 | ND   | ND   | ND   | 0.17 | 0.93 |
| gi348174445 | 0.16 | 0.69 | 0.06 | ND   | 0.90 | 0.16 | 0.59 | 0.02 | ND   | 0.77 | 1.17 |

|             |      |      |      |      |      |      |      |      |      |      |      |
|-------------|------|------|------|------|------|------|------|------|------|------|------|
| gi348170813 | 0.22 | 0.10 | ND   | ND   | 0.32 | 0.23 | 0.05 | ND   | ND   | 0.28 | 1.12 |
| gi348169787 | 0.15 | 0.06 | ND   | ND   | 0.21 | 0.09 | 0.09 | ND   | ND   | 0.19 | 1.13 |
| gi348172545 | 0.16 | 0.06 | 0.05 | 0.02 | 0.29 | 0.13 | 0.12 | 0.05 | 0.02 | 0.33 | 0.89 |
| gi348172687 | 0.16 | 0.41 | 0.08 | 0.05 | 0.70 | 0.14 | 0.39 | 0.04 | 0.03 | 0.59 | 1.18 |
| gi348177056 | 0.21 | 0.14 | ND   | ND   | 0.36 | 0.13 | 0.16 | ND   | ND   | 0.29 | 1.25 |
| gi348176471 | 0.16 | 0.09 | 0.06 | 0.05 | 0.36 | 0.19 | 0.05 | 0.05 | 0.03 | 0.32 | 1.12 |
| gi348176498 | 0.08 | ND   | ND   | ND   | 0.08 | 0.01 | ND   | ND   | ND   | 0.01 | 6.00 |
| gi348171330 | 0.10 | 0.10 | ND   | ND   | 0.19 | 0.12 | 0.05 | ND   | ND   | 0.17 | 1.14 |
| gi348171412 | 0.18 | 0.58 | 0.46 | 0.34 | 1.57 | 0.25 | 0.69 | 0.48 | 0.24 | 1.66 | 0.95 |
| gi348176769 | 0.32 | 0.32 | ND   | ND   | 0.63 | 0.05 | 0.18 | ND   | ND   | 0.24 | 2.67 |
| gi348173953 | 0.20 | 0.29 | 0.29 | 0.18 | 0.95 | 0.07 | 0.21 | 0.04 | 0.20 | 0.52 | 1.83 |
| gi348176597 | 0.14 | 0.21 | 0.21 | 0.07 | 0.63 | 0.14 | 0.31 | 0.05 | 0.10 | 0.59 | 1.06 |
| gi348172933 | 0.10 | 0.07 | 0.02 | ND   | 0.19 | 0.16 | 0.05 | 0.03 | ND   | 0.23 | 0.84 |
| gi348173513 | 0.73 | 1.07 | ND   | ND   | 1.80 | 0.53 | 0.53 | ND   | ND   | 1.07 | 1.69 |
| gi348173198 | 0.18 | 0.08 | ND   | ND   | 0.26 | 0.21 | 0.08 | ND   | ND   | 0.30 | 0.89 |
| gi348175863 | 0.18 | 0.70 | 0.08 | ND   | 0.97 | 0.15 | 0.59 | 0.03 | ND   | 0.77 | 1.26 |
| gi348175222 | 0.48 | 0.65 | ND   | ND   | 1.13 | 0.52 | 0.74 | ND   | ND   | 1.26 | 0.90 |
| gi348176407 | 0.22 | 0.08 | ND   | ND   | 0.29 | 0.18 | 0.20 | ND   | ND   | 0.37 | 0.79 |
| gi348171814 | 0.35 | 0.45 | 0.26 | 0.13 | 1.19 | 0.48 | 0.42 | 0.19 | 0.23 | 1.32 | 0.90 |
| gi348176850 | 0.23 | 0.15 | 0.15 | 0.11 | 0.64 | 0.11 | 0.11 | 0.04 | 0.17 | 0.43 | 1.50 |
| gi348172300 | 0.38 | 0.21 | ND   | ND   | 0.59 | 0.10 | 0.17 | ND   | ND   | 0.28 | 2.13 |
| gi348170818 | 0.73 | 0.27 | ND   | ND   | 1.00 | 0.40 | 0.40 | ND   | ND   | 0.80 | 1.25 |
| gi348174635 | 0.12 | 0.19 | ND   | ND   | 0.31 | 0.11 | 0.19 | ND   | ND   | 0.29 | 1.04 |
| gi348170244 | 0.19 | 0.20 | 0.04 | 0.06 | 0.48 | 0.19 | 0.11 | 0.07 | 0.11 | 0.48 | 1.00 |
| gi348175322 | 0.10 | 0.14 | ND   | ND   | 0.24 | 0.12 | 0.16 | ND   | ND   | 0.29 | 0.83 |

|             |      |      |      |      |       |      |      |      |      |      |      |
|-------------|------|------|------|------|-------|------|------|------|------|------|------|
| gi348169633 | 0.37 | 0.26 | ND   | ND   | 0.63  | 0.33 | 0.44 | ND   | ND   | 0.78 | 0.81 |
| gi348176426 | 0.15 | 0.23 | 0.12 | ND   | 0.51  | 0.20 | 0.12 | 0.06 | ND   | 0.38 | 1.32 |
| gi348176411 | 0.21 | 0.29 | 0.15 | ND   | 0.65  | 0.19 | 0.15 | 0.10 | ND   | 0.44 | 1.48 |
| gi348169384 | 0.37 | 0.15 | ND   | ND   | 0.52  | 0.37 | 0.19 | ND   | ND   | 0.56 | 0.93 |
| gi348174790 | 0.19 | 0.12 | ND   | ND   | 0.31  | 0.15 | 0.15 | ND   | ND   | 0.31 | 1.00 |
| gi348171275 | 0.16 | 0.03 | 0.10 | ND   | 0.30  | 0.26 | 0.05 | 0.07 | ND   | 0.38 | 0.78 |
| gi348172983 | 0.21 | 0.15 | 0.11 | ND   | 0.47  | 0.15 | 0.21 | 0.09 | ND   | 0.45 | 1.05 |
| gi348169223 | 1.00 | ND   | ND   | ND   | 1.00  | 0.60 | ND   | ND   | ND   | 0.60 | 1.67 |
| gi41350159  | 0.01 | 0.01 | 0.01 | ND   | 0.03  | 0.01 | 0.01 | 0.01 | ND   | 0.02 | 1.69 |
| gi348169040 | 0.06 | 0.04 | ND   | ND   | 0.10  | 0.03 | 0.04 | ND   | ND   | 0.06 | 1.56 |
| gi348176924 | 0.26 | 0.32 | ND   | ND   | 0.59  | 0.35 | 0.47 | ND   | ND   | 0.82 | 0.71 |
| gi348175390 | 0.24 | 0.14 | 0.11 | 0.16 | 0.65  | 0.22 | 0.08 | 0.22 | 0.22 | 0.73 | 0.89 |
| gi348176398 | 0.28 | 0.13 | ND   | ND   | 0.41  | 0.44 | 0.28 | ND   | ND   | 0.72 | 0.57 |
| gi348174871 | 0.09 | 0.05 | 0.02 | 0.02 | 0.17  | 0.07 | 0.07 | 0.02 | 0.02 | 0.17 | 1.00 |
| gi41350151  | 0.20 | 0.20 | ND   | ND   | 0.41  | 0.14 | 0.09 | ND   | ND   | 0.23 | 1.80 |
| gi348172783 | 2.25 | 3.50 | 3.50 | 1.75 | 11.00 | 2.50 | 3.00 | 1.25 | 0.50 | 7.25 | 1.52 |
| gi348172775 | 0.14 | 0.35 | 0.35 | 0.05 | 0.89  | 0.16 | 0.13 | 0.16 | 0.05 | 0.49 | 1.81 |
| gi348169763 | 0.39 | 0.17 | 0.09 | ND   | 0.65  | 0.61 | 0.22 | 0.30 | ND   | 1.13 | 0.58 |
| gi348174004 | 0.17 | 0.32 | 0.15 | 0.06 | 0.70  | 0.21 | 0.19 | 0.09 | 0.06 | 0.55 | 1.28 |
| gi348176395 | 0.13 | 0.11 | ND   | 0.04 | 0.28  | 0.15 | 0.07 | ND   | 0.03 | 0.25 | 1.11 |
| gi348173522 | 0.11 | 0.05 | ND   | ND   | 0.15  | 0.07 | 0.06 | ND   | ND   | 0.13 | 1.18 |
| gi348176419 | 0.18 | 0.24 | 0.12 | ND   | 0.53  | 0.18 | 0.12 | 0.10 | ND   | 0.39 | 1.35 |
| gi348175109 | 0.17 | ND   | ND   | ND   | 0.17  | 0.17 | ND   | ND   | ND   | 0.17 | 1.00 |
| gi348169236 | 0.04 | 0.05 | ND   | 0.01 | 0.10  | 0.03 | 0.05 | ND   | 0.01 | 0.09 | 1.05 |
| gi348176767 | 0.12 | 0.39 | ND   | ND   | 0.52  | 0.26 | 0.26 | ND   | ND   | 0.52 | 1.00 |



|             |      |      |      |      |      |      |      |      |      |      |      |
|-------------|------|------|------|------|------|------|------|------|------|------|------|
| gi348169091 | 0.11 | 0.09 | 0.04 | ND   | 0.24 | 0.07 | 0.09 | 0.03 | ND   | 0.19 | 1.29 |
| gi348169576 | 0.11 | 0.14 | 0.10 | 0.08 | 0.43 | 0.11 | 0.31 | 0.10 | 0.06 | 0.57 | 0.76 |
| gi348171757 | 0.24 | 0.06 | 0.06 | ND   | 0.35 | 0.15 | 0.29 | 0.15 | ND   | 0.59 | 0.60 |
| gi348174428 | 0.06 | 0.09 | ND   | ND   | 0.15 | 0.09 | 0.10 | ND   | ND   | 0.19 | 0.83 |
| gi348168969 | 0.16 | 0.18 | ND   | ND   | 0.33 | 0.25 | 0.08 | ND   | ND   | 0.33 | 1.00 |
| gi348176884 | 0.12 | 0.22 | 0.12 | ND   | 0.46 | 0.09 | 0.05 | 0.03 | ND   | 0.17 | 2.73 |
| gi348176414 | 0.14 | ND   | ND   | ND   | 0.14 | 0.18 | ND   | ND   | ND   | 0.18 | 0.80 |
| gi348170434 | 0.21 | 0.18 | ND   | ND   | 0.39 | 0.11 | 0.08 | ND   | ND   | 0.18 | 2.14 |
| gi348176469 | 0.16 | ND   | ND   | ND   | 0.16 | 0.14 | ND   | ND   | ND   | 0.14 | 1.14 |
| gi348174014 | 0.19 | 0.38 | 0.10 | ND   | 0.67 | 0.12 | 0.45 | 0.05 | ND   | 0.62 | 1.08 |
| gi348169562 | 0.08 | 0.11 | ND   | 0.02 | 0.22 | 0.06 | 0.09 | ND   | 0.02 | 0.18 | 1.24 |
| gi348171376 | 0.07 | 0.02 | ND   | ND   | 0.09 | 0.06 | 0.03 | ND   | ND   | 0.09 | 1.00 |
| gi348171071 | 0.15 | ND   | ND   | ND   | 0.15 | 0.11 | ND   | ND   | ND   | 0.11 | 1.33 |
| gi348170477 | 0.17 | 0.47 | ND   | ND   | 0.64 | 0.09 | 0.57 | ND   | ND   | 0.66 | 0.97 |
| gi348174145 | 0.20 | 0.05 | ND   | ND   | 0.25 | 0.23 | 0.10 | ND   | ND   | 0.33 | 0.77 |
| gi348169484 | 0.10 | 0.06 | ND   | ND   | 0.16 | 0.08 | 0.05 | ND   | ND   | 0.13 | 1.30 |
| gi348171447 | 0.29 | 0.61 | 0.25 | ND   | 1.14 | 0.29 | 0.46 | 0.07 | ND   | 0.82 | 1.39 |
| gi348169042 | 0.29 | 0.32 | ND   | ND   | 0.61 | 0.25 | 0.07 | ND   | ND   | 0.32 | 1.89 |
| gi348176671 | 0.24 | 0.18 | ND   | ND   | 0.42 | 0.15 | 0.24 | ND   | ND   | 0.39 | 1.08 |
| gi13162637  | 0.02 | 0.04 | ND   | ND   | 0.06 | 0.03 | 0.03 | ND   | ND   | 0.06 | 1.06 |
| gi348169479 | 0.12 | 0.14 | ND   | ND   | 0.25 | 0.14 | 0.15 | ND   | ND   | 0.29 | 0.88 |
| gi348172449 | 0.02 | 0.02 | ND   | ND   | 0.03 | 0.01 | 0.03 | ND   | ND   | 0.04 | 0.87 |
| gi348173990 | 0.13 | 0.15 | ND   | ND   | 0.27 | 0.11 | 0.11 | ND   | ND   | 0.22 | 1.25 |
| gi348168991 | 0.39 | 1.06 | ND   | ND   | 1.44 | 0.72 | 1.28 | ND   | ND   | 2.00 | 0.72 |
| gi348171501 | 0.09 | 0.25 | 0.11 | 0.06 | 0.51 | 0.10 | 0.19 | 0.06 | 0.06 | 0.41 | 1.24 |

|             |      |      |      |      |      |      |      |      |      |      |      |
|-------------|------|------|------|------|------|------|------|------|------|------|------|
| gi348169336 | 0.78 | 1.00 | 0.44 | ND   | 2.22 | 0.67 | 0.56 | 0.44 | ND   | 1.67 | 1.33 |
| gi348168944 | 0.11 | ND   | ND   | ND   | 0.11 | 0.05 | ND   | ND   | ND   | 0.05 | 2.33 |
| gi348175473 | 0.09 | 0.06 | ND   | 0.04 | 0.19 | 0.19 | 0.02 | ND   | 0.05 | 0.26 | 0.71 |
| gi348169089 | 0.09 | 0.08 | 0.05 | 0.04 | 0.26 | 0.15 | 0.12 | 0.03 | 0.04 | 0.33 | 0.77 |
| gi348170090 | 0.16 | 0.16 | ND   | ND   | 0.31 | 0.11 | 0.09 | ND   | ND   | 0.20 | 1.56 |
| gi348171622 | 0.70 | 0.60 | ND   | ND   | 1.30 | 1.20 | 0.40 | ND   | ND   | 1.60 | 0.81 |
| gi348175425 | 0.11 | 0.16 | ND   | ND   | 0.28 | 0.20 | 0.07 | ND   | ND   | 0.26 | 1.06 |
| gi348169189 | 0.08 | 0.07 | ND   | ND   | 0.15 | 0.11 | 0.06 | ND   | ND   | 0.17 | 0.87 |
| gi348173114 | 0.16 | 0.05 | ND   | ND   | 0.20 | 0.32 | 0.09 | ND   | ND   | 0.41 | 0.50 |
| gi348169079 | 0.30 | ND   | ND   | ND   | 0.30 | 0.48 | ND   | ND   | ND   | 0.48 | 0.64 |
| gi348169163 | 0.12 | 0.05 | ND   | ND   | 0.17 | 0.08 | 0.15 | ND   | ND   | 0.24 | 0.71 |
| gi348175267 | 0.27 | 0.31 | ND   | 0.15 | 0.73 | 0.23 | 0.08 | ND   | 0.12 | 0.42 | 1.73 |
| gi348170206 | 0.09 | 0.19 | 0.18 | 0.09 | 0.55 | 0.11 | 0.16 | 0.15 | 0.12 | 0.54 | 1.03 |
| gi348175112 | 0.18 | 0.05 | 0.13 | ND   | 0.37 | 0.05 | 0.13 | 0.08 | ND   | 0.26 | 1.40 |
| gi348171821 | 0.06 | 0.13 | 0.09 | 0.04 | 0.33 | 0.04 | 0.17 | 0.12 | 0.08 | 0.42 | 0.79 |
| gi348175317 | 0.19 | ND   | ND   | ND   | 0.19 | 0.36 | ND   | ND   | ND   | 0.36 | 0.54 |
| gi348169294 | 0.29 | 0.08 | ND   | ND   | 0.38 | 0.38 | 0.13 | ND   | ND   | 0.50 | 0.75 |
| gi348176685 | 0.05 | 0.05 | ND   | ND   | 0.10 | 0.05 | 0.05 | ND   | ND   | 0.10 | 1.00 |
| gi348170940 | 0.08 | 0.02 | ND   | ND   | 0.10 | 0.12 | 0.06 | ND   | ND   | 0.17 | 0.60 |
| gi348176725 | 0.78 | 1.67 | ND   | 1.22 | 3.67 | 0.56 | 1.33 | ND   | 1.44 | 3.33 | 1.10 |
| gi348172925 | 0.13 | 0.20 | 0.15 | 0.09 | 0.57 | 0.17 | 0.22 | 0.06 | 0.04 | 0.48 | 1.19 |
| gi348176473 | 0.19 | 0.24 | 0.05 | ND   | 0.49 | 0.32 | 0.32 | 0.05 | ND   | 0.70 | 0.69 |
| gi348171838 | 0.18 | ND   | 0.08 | ND   | 0.25 | 0.33 | ND   | 0.08 | ND   | 0.40 | 0.63 |
| gi348169354 | 0.10 | 0.12 | ND   | ND   | 0.22 | 0.06 | 0.04 | ND   | ND   | 0.10 | 2.14 |
| gi348170207 | 0.12 | 0.17 | ND   | ND   | 0.29 | 0.07 | 0.15 | ND   | ND   | 0.22 | 1.31 |

|             |      |      |      |      |      |      |      |      |      |      |      |
|-------------|------|------|------|------|------|------|------|------|------|------|------|
| gi348172420 | 0.22 | ND   | ND   | ND   | 0.22 | 0.13 | ND   | ND   | ND   | 0.13 | 1.75 |
| gi348169342 | 0.28 | 0.60 | 0.16 | 0.20 | 1.24 | 0.44 | 0.88 | 0.24 | 0.12 | 1.68 | 0.74 |
| gi348175004 | 0.07 | 0.05 | ND   | ND   | 0.12 | 0.08 | 0.03 | ND   | ND   | 0.11 | 1.09 |
| gi348169591 | 0.21 | 0.09 | ND   | ND   | 0.29 | 0.12 | 0.18 | ND   | ND   | 0.29 | 1.00 |
| gi348171783 | 0.21 | ND   | ND   | ND   | 0.21 | 0.18 | ND   | ND   | ND   | 0.18 | 1.17 |
| gi348169191 | 0.08 | ND   | ND   | ND   | 0.08 | 0.07 | ND   | ND   | ND   | 0.07 | 1.17 |
| gi348169207 | 0.17 | ND   | ND   | ND   | 0.17 | 0.10 | ND   | ND   | ND   | 0.10 | 1.75 |
| gi348169398 | 0.16 | 0.20 | ND   | ND   | 0.36 | 0.07 | 0.14 | ND   | ND   | 0.20 | 1.78 |
| gi348169469 | 0.11 | 0.07 | ND   | ND   | 0.18 | 0.11 | 0.05 | ND   | ND   | 0.16 | 1.10 |
| gi348173002 | 0.27 | 0.54 | 0.27 | 0.15 | 1.23 | 0.27 | 0.35 | 0.12 | 0.15 | 0.88 | 1.39 |
| gi348171396 | 0.03 | ND   | ND   | ND   | 0.03 | 0.02 | ND   | ND   | ND   | 0.02 | 1.50 |
| gi348173981 | 0.19 | 0.22 | ND   | ND   | 0.41 | 0.38 | 0.53 | ND   | ND   | 0.91 | 0.45 |
| gi348175288 | 0.03 | ND   | ND   | ND   | 0.03 | 0.02 | ND   | ND   | ND   | 0.02 | 1.20 |
| gi348176420 | 0.05 | 0.06 | ND   | ND   | 0.11 | 0.06 | 0.03 | ND   | ND   | 0.08 | 1.30 |
| gi348171791 | 0.03 | ND   | ND   | ND   | 0.03 | 0.01 | ND   | ND   | ND   | 0.01 | 3.00 |
| gi348174413 | 0.08 | ND   | ND   | ND   | 0.08 | 0.05 | ND   | ND   | ND   | 0.05 | 1.50 |
| gi348174234 | 0.04 | 0.03 | ND   | ND   | 0.06 | 0.02 | 0.01 | ND   | ND   | 0.03 | 2.00 |
| gi348176609 | 0.08 | ND   | ND   | ND   | 0.08 | 0.03 | ND   | ND   | ND   | 0.03 | 3.00 |
| gi348171466 | 0.09 | 0.18 | 0.04 | ND   | 0.31 | 0.10 | 0.16 | 0.03 | ND   | 0.29 | 1.05 |
| gi348173931 | 0.13 | 0.15 | 0.06 | ND   | 0.33 | 0.21 | 0.19 | 0.08 | ND   | 0.48 | 0.70 |
| gi348176520 | 0.15 | 0.22 | ND   | ND   | 0.37 | 0.15 | 0.17 | ND   | ND   | 0.32 | 1.15 |
| gi348170936 | 0.06 | 0.07 | 0.04 | 0.04 | 0.21 | 0.05 | 0.08 | 0.06 | 0.04 | 0.23 | 0.91 |
| gi348172860 | 0.07 | ND   | ND   | ND   | 0.07 | 0.02 | ND   | ND   | ND   | 0.02 | 3.00 |
| gi348169396 | 0.07 | 0.09 | ND   | ND   | 0.15 | 0.05 | 0.10 | ND   | ND   | 0.15 | 1.00 |
| gi348175716 | 0.11 | 0.19 | 0.09 | ND   | 0.40 | 0.25 | 0.19 | 0.08 | ND   | 0.51 | 0.78 |

|             |      |      |      |      |      |      |      |      |      |      |      |
|-------------|------|------|------|------|------|------|------|------|------|------|------|
| gi348170982 | 0.08 | ND   | ND   | ND   | 0.08 | 0.07 | ND   | ND   | ND   | 0.07 | 1.20 |
| gi348173992 | 0.07 | ND   | ND   | ND   | 0.07 | 0.07 | ND   | ND   | ND   | 0.07 | 1.00 |
| gi348172851 | 0.24 | 0.36 | 0.08 | ND   | 0.68 | 0.24 | 0.48 | 0.24 | ND   | 0.96 | 0.71 |
| gi348176700 | 0.10 | 0.53 | 0.12 | 0.12 | 0.86 | 0.15 | 0.10 | 0.24 | 0.25 | 0.75 | 1.16 |
| gi348172665 | 0.13 | 0.28 | ND   | ND   | 0.41 | 0.22 | 0.24 | ND   | ND   | 0.46 | 0.90 |
| gi348175409 | 0.06 | 0.06 | ND   | ND   | 0.13 | 0.04 | 0.06 | ND   | ND   | 0.11 | 1.20 |
| gi348175436 | 0.09 | 0.03 | ND   | ND   | 0.12 | 0.04 | 0.04 | ND   | ND   | 0.09 | 1.33 |
| gi348175296 | 0.24 | 0.40 | ND   | ND   | 0.64 | 0.20 | 0.16 | ND   | ND   | 0.36 | 1.78 |
| gi348172896 | 0.14 | 0.39 | 0.45 | 0.30 | 1.27 | 0.07 | 0.11 | 0.48 | 0.43 | 1.09 | 1.17 |
| gi348171474 | 0.13 | 0.28 | 0.07 | ND   | 0.48 | 0.09 | 0.28 | 0.04 | ND   | 0.41 | 1.16 |
| gi348172143 | 0.30 | ND   | 0.20 | ND   | 0.50 | 0.25 | ND   | 0.15 | ND   | 0.40 | 1.25 |
| gi348175433 | 0.18 | 0.06 | ND   | ND   | 0.24 | 0.09 | 0.06 | ND   | ND   | 0.15 | 1.60 |
| gi348172914 | 2.00 | 1.67 | ND   | ND   | 3.67 | 0.67 | 1.67 | ND   | ND   | 2.33 | 1.57 |
| gi348175213 | 0.10 | 0.09 | 0.12 | ND   | 0.31 | 0.10 | 0.07 | 0.09 | ND   | 0.26 | 1.20 |
| gi348169144 | 0.29 | 0.29 | ND   | ND   | 0.57 | 0.19 | 0.33 | ND   | ND   | 0.52 | 1.09 |
| gi348173036 | 0.29 | 0.29 | 0.10 | ND   | 0.67 | 0.52 | 0.33 | 0.24 | ND   | 1.10 | 0.61 |
| gi348171702 | 0.06 | 0.05 | 0.03 | ND   | 0.14 | 0.09 | 0.05 | 0.03 | ND   | 0.17 | 0.82 |
| gi348170525 | 0.67 | 1.11 | 0.33 | ND   | 2.11 | 0.56 | 0.56 | 0.78 | ND   | 1.89 | 1.12 |
| gi347438908 | 0.08 | 0.08 | ND   | ND   | 0.16 | 0.05 | 0.08 | ND   | ND   | 0.13 | 1.25 |
| gi348171942 | 0.05 | 0.11 | 0.02 | 0.02 | 0.20 | 0.05 | 0.02 | 0.02 | 0.05 | 0.15 | 1.36 |
| gi348170580 | 0.05 | 0.02 | ND   | ND   | 0.07 | 0.03 | 0.03 | ND   | ND   | 0.06 | 1.17 |
| gi348171266 | 0.07 | 0.04 | ND   | ND   | 0.11 | 0.08 | 0.04 | ND   | ND   | 0.12 | 0.89 |
| gi348171970 | 0.04 | 0.05 | ND   | ND   | 0.09 | 0.02 | 0.05 | ND   | ND   | 0.07 | 1.38 |
| gi348170939 | 0.03 | 0.12 | 0.11 | 0.18 | 0.44 | 0.04 | 0.07 | 0.08 | 0.19 | 0.38 | 1.19 |
| gi348173072 | 0.16 | 0.19 | ND   | 0.06 | 0.41 | 0.13 | 0.06 | ND   | 0.13 | 0.31 | 1.30 |

|             |      |      |      |      |      |      |      |      |      |      |      |
|-------------|------|------|------|------|------|------|------|------|------|------|------|
| gi348176594 | 0.03 | 0.03 | ND   | ND   | 0.06 | 0.04 | 0.02 | ND   | ND   | 0.06 | 1.00 |
| gi348170795 | 0.09 | 0.03 | ND   | ND   | 0.12 | 0.14 | 0.09 | ND   | ND   | 0.22 | 0.54 |
| gi348170779 | 0.09 | 0.11 | ND   | ND   | 0.21 | 0.11 | 0.09 | ND   | ND   | 0.21 | 1.00 |
| gi348170871 | 0.31 | 0.25 | ND   | 0.13 | 0.69 | 0.13 | 0.25 | ND   | 0.13 | 0.50 | 1.38 |
| gi348176863 | 0.06 | 0.13 | ND   | 0.03 | 0.22 | 0.03 | 0.05 | ND   | 0.03 | 0.12 | 1.90 |
| gi348173054 | 0.04 | 0.02 | ND   | ND   | 0.06 | 0.04 | 0.01 | ND   | ND   | 0.06 | 1.00 |
| gi348176766 | 0.10 | 0.15 | ND   | 0.06 | 0.31 | 0.10 | 0.13 | ND   | 0.17 | 0.40 | 0.79 |
| gi348174892 | 0.06 | 0.07 | 0.09 | ND   | 0.22 | 0.07 | 0.04 | 0.02 | ND   | 0.14 | 1.64 |
| gi348169159 | 0.08 | ND   | ND   | ND   | 0.08 | 0.05 | ND   | ND   | ND   | 0.05 | 1.67 |
| gi348171923 | 0.05 | 0.05 | ND   | ND   | 0.09 | 0.03 | 0.05 | ND   | ND   | 0.08 | 1.25 |
| gi13162644  | 0.08 | 0.23 | ND   | ND   | 0.31 | 0.10 | 0.11 | ND   | ND   | 0.21 | 1.46 |
| gi348172910 | 0.04 | ND   | ND   | ND   | 0.04 | 0.05 | ND   | ND   | ND   | 0.05 | 0.83 |
| gi348174886 | 0.11 | 0.18 | ND   | ND   | 0.30 | 0.14 | 0.16 | ND   | ND   | 0.30 | 1.00 |
| gi348169291 | 0.11 | ND   | ND   | ND   | 0.11 | 0.07 | ND   | ND   | ND   | 0.07 | 1.67 |
| gi348173101 | 0.08 | ND   | ND   | ND   | 0.08 | 0.05 | ND   | ND   | ND   | 0.05 | 1.67 |
| gi348175718 | 0.63 | 0.38 | ND   | ND   | 1.00 | 1.00 | 0.38 | ND   | ND   | 1.38 | 0.73 |
| gi348176800 | 0.08 | 0.06 | ND   | ND   | 0.15 | 0.05 | 0.03 | ND   | ND   | 0.08 | 1.80 |
| gi348171620 | 0.14 | 0.11 | ND   | ND   | 0.25 | 0.11 | 0.06 | ND   | ND   | 0.17 | 1.50 |
| gi348172883 | 0.07 | ND   | ND   | ND   | 0.07 | 0.03 | ND   | ND   | ND   | 0.03 | 2.50 |
| gi348169928 | 0.45 | 1.64 | 0.64 | 0.82 | 3.55 | 0.55 | 0.64 | 1.00 | 1.09 | 3.27 | 1.08 |
| gi348173304 | 0.05 | 0.04 | 0.03 | ND   | 0.12 | 0.03 | 0.02 | 0.04 | ND   | 0.09 | 1.33 |
| gi348172785 | 0.08 | ND   | ND   | ND   | 0.08 | 0.06 | ND   | ND   | ND   | 0.06 | 1.25 |
| gi348172416 | 0.71 | ND   | ND   | ND   | 0.71 | 0.86 | ND   | ND   | ND   | 0.86 | 0.83 |
| gi348173138 | 0.06 | 0.02 | ND   | ND   | 0.08 | 0.05 | 0.02 | ND   | ND   | 0.07 | 1.17 |
| gi348174973 | 0.16 | 0.06 | ND   | ND   | 0.22 | 0.13 | 0.06 | ND   | ND   | 0.19 | 1.17 |

|             |      |      |      |      |      |      |      |      |      |      |      |
|-------------|------|------|------|------|------|------|------|------|------|------|------|
| gi348176849 | 0.10 | 0.08 | ND   | ND   | 0.18 | 0.10 | 0.06 | ND   | ND   | 0.16 | 1.13 |
| gi348176666 | 0.05 | 0.10 | ND   | ND   | 0.15 | 0.09 | 0.04 | ND   | ND   | 0.13 | 1.17 |
| gi348176415 | 0.14 | 0.11 | ND   | ND   | 0.26 | 0.06 | 0.06 | ND   | ND   | 0.11 | 2.25 |
| gi348176418 | 0.18 | 0.07 | ND   | ND   | 0.25 | 0.11 | 0.07 | ND   | ND   | 0.18 | 1.40 |
| gi348171407 | 0.03 | 0.02 | ND   | ND   | 0.05 | 0.04 | 0.02 | ND   | ND   | 0.06 | 0.89 |
| gi348174787 | 0.63 | ND   | ND   | ND   | 0.63 | 1.38 | ND   | ND   | ND   | 1.38 | 0.45 |
| gi348169583 | 0.17 | 0.14 | 0.17 | 0.17 | 0.66 | 0.21 | 0.14 | 0.10 | 0.14 | 0.59 | 1.12 |
| gi348176819 | 0.09 | ND   | ND   | ND   | 0.09 | 0.04 | ND   | ND   | ND   | 0.04 | 2.50 |
| gi348169249 | 0.22 | ND   | ND   | ND   | 0.22 | 0.26 | ND   | ND   | ND   | 0.26 | 0.83 |
| gi348171617 | 0.11 | ND   | ND   | ND   | 0.11 | 0.11 | ND   | ND   | ND   | 0.11 | 1.00 |
| gi348174232 | 0.31 | 0.31 | ND   | ND   | 0.63 | 0.19 | 0.31 | ND   | ND   | 0.50 | 1.25 |
| gi348171859 | 0.01 | 0.02 | ND   | ND   | 0.03 | 0.02 | 0.02 | ND   | ND   | 0.03 | 0.83 |
| gi348169200 | 0.08 | 0.08 | ND   | ND   | 0.17 | 0.10 | 0.10 | ND   | ND   | 0.21 | 0.80 |
| gi348176626 | 0.07 | ND   | ND   | ND   | 0.07 | 0.04 | ND   | ND   | ND   | 0.04 | 2.00 |
| gi348171335 | 0.04 | 0.02 | ND   | ND   | 0.05 | 0.04 | 0.03 | ND   | ND   | 0.06 | 0.86 |
| gi348172905 | 0.05 | 0.16 | 0.06 | 0.06 | 0.33 | 0.08 | 0.13 | 0.07 | 0.04 | 0.33 | 1.00 |
| gi348169341 | 0.02 | ND   | ND   | 0.01 | 0.03 | 0.05 | ND   | ND   | 0.01 | 0.06 | 0.50 |
| gi348171839 | 0.03 | ND   | ND   | ND   | 0.03 | 0.04 | ND   | ND   | ND   | 0.04 | 0.67 |
| gi348172417 | 0.06 | ND   | ND   | ND   | 0.06 | 0.10 | ND   | ND   | ND   | 0.10 | 0.67 |
| gi348174018 | 0.05 | 0.74 | 0.04 | ND   | 0.84 | 0.09 | 0.03 | 0.12 | ND   | 0.24 | 3.44 |
| gi348173115 | 0.06 | 0.03 | ND   | 0.03 | 0.13 | 0.03 | 0.03 | ND   | 0.03 | 0.10 | 1.33 |
| gi348169509 | 0.10 | 0.15 | ND   | ND   | 0.24 | 0.05 | 0.10 | ND   | ND   | 0.15 | 1.67 |
| gi348170695 | 0.13 | 0.43 | 0.13 | 0.23 | 0.93 | 0.10 | 0.33 | 0.23 | 0.20 | 0.87 | 1.08 |
| gi348175500 | 0.04 | 0.12 | 0.13 | 0.09 | 0.38 | 0.05 | 0.03 | 0.12 | 0.11 | 0.31 | 1.21 |
| gi348171739 | 0.15 | 0.15 | ND   | ND   | 0.31 | 0.31 | 0.19 | ND   | ND   | 0.50 | 0.62 |

|             |      |      |      |      |      |      |      |      |      |      |      |
|-------------|------|------|------|------|------|------|------|------|------|------|------|
| gi348172844 | 0.05 | 0.10 | 0.05 | ND   | 0.20 | 0.03 | 0.10 | 0.03 | ND   | 0.15 | 1.33 |
| gi348173194 | 0.09 | ND   | ND   | ND   | 0.09 | 0.04 | ND   | ND   | ND   | 0.04 | 2.00 |
| gi348175942 | 0.04 | ND   | ND   | ND   | 0.04 | 0.02 | ND   | ND   | ND   | 0.02 | 2.00 |
| gi348174734 | 0.07 | ND   | ND   | ND   | 0.07 | 0.05 | ND   | ND   | ND   | 0.05 | 1.33 |
| gi348173933 | 0.03 | 0.11 | ND   | ND   | 0.15 | 0.02 | 0.02 | ND   | ND   | 0.05 | 3.00 |
| gi348176421 | 0.10 | ND   | ND   | ND   | 0.10 | 0.08 | ND   | ND   | ND   | 0.08 | 1.33 |
| gi348172212 | 0.04 | 0.06 | 0.06 | 0.04 | 0.20 | 0.05 | 0.05 | 0.04 | 0.02 | 0.16 | 1.25 |
| gi348175615 | 0.05 | ND   | 0.05 | 0.06 | 0.16 | 0.04 | ND   | 0.02 | 0.04 | 0.10 | 1.63 |
| gi348171829 | 0.13 | ND   | ND   | ND   | 0.13 | 0.17 | ND   | ND   | ND   | 0.17 | 0.80 |
| gi348170168 | 0.25 | 0.38 | ND   | 0.25 | 0.88 | 0.19 | 0.38 | ND   | 0.13 | 0.69 | 1.27 |
| gi348173112 | 0.12 | ND   | ND   | ND   | 0.12 | 0.12 | ND   | ND   | ND   | 0.12 | 1.00 |
| gi348176416 | 0.08 | ND   | ND   | ND   | 0.08 | 0.06 | ND   | ND   | ND   | 0.06 | 1.33 |
| gi348176812 | 0.11 | ND   | ND   | ND   | 0.11 | 0.11 | ND   | ND   | ND   | 0.11 | 1.00 |
| gi348175399 | 0.11 | 0.17 | ND   | ND   | 0.28 | 0.06 | 0.08 | ND   | ND   | 0.14 | 2.00 |
| gi348175275 | 0.10 | ND   | ND   | ND   | 0.10 | 0.05 | ND   | ND   | ND   | 0.05 | 2.00 |
| gi348176573 | 0.09 | ND   | ND   | ND   | 0.09 | 0.11 | ND   | ND   | ND   | 0.11 | 0.80 |
| gi348175476 | 0.05 | 0.06 | 0.03 | ND   | 0.14 | 0.09 | 0.06 | 0.05 | ND   | 0.21 | 0.69 |
| gi348176805 | 0.10 | 0.07 | ND   | ND   | 0.17 | 0.10 | 0.10 | ND   | ND   | 0.20 | 0.88 |
| gi348175481 | 0.17 | ND   | ND   | ND   | 0.17 | 0.25 | ND   | ND   | ND   | 0.25 | 0.67 |
| gi348170348 | 0.07 | 0.22 | 0.04 | 0.04 | 0.36 | 0.11 | 0.18 | 0.15 | 0.07 | 0.51 | 0.71 |
| gi348175444 | 0.27 | 0.47 | ND   | ND   | 0.73 | 0.53 | 0.47 | ND   | ND   | 1.00 | 0.73 |
| gi348175025 | 0.09 | ND   | ND   | ND   | 0.09 | 0.14 | ND   | ND   | ND   | 0.14 | 0.67 |
| gi348171618 | 0.21 | ND   | ND   | ND   | 0.21 | 0.16 | ND   | ND   | ND   | 0.16 | 1.33 |
| gi348175360 | 0.05 | ND   | 0.05 | ND   | 0.11 | 0.03 | ND   | 0.03 | ND   | 0.05 | 2.00 |
| gi348175301 | 0.12 | ND   | ND   | ND   | 0.12 | 0.09 | ND   | ND   | ND   | 0.09 | 1.33 |

|             |      |      |      |      |      |      |      |      |      |      |      |
|-------------|------|------|------|------|------|------|------|------|------|------|------|
| gi348172686 | 0.17 | ND   | 0.13 | 0.08 | 0.38 | 0.08 | ND   | 0.13 | 0.25 | 0.46 | 0.82 |
| gi348170759 | 0.11 | ND   | ND   | ND   | 0.11 | 0.11 | ND   | ND   | ND   | 0.11 | 1.00 |
| gi348169862 | 0.11 | 0.11 | ND   | ND   | 0.23 | 0.09 | 0.20 | ND   | ND   | 0.29 | 0.80 |
| gi348174619 | 0.27 | 0.27 | ND   | ND   | 0.53 | 0.33 | 0.33 | ND   | ND   | 0.67 | 0.80 |
| gi348171969 | 0.25 | ND   | ND   | ND   | 0.25 | 0.13 | ND   | ND   | ND   | 0.13 | 2.00 |
| gi348173254 | 0.07 | ND   | ND   | ND   | 0.07 | 0.03 | ND   | ND   | ND   | 0.03 | 2.00 |
| gi348175962 | 0.33 | ND   | ND   | ND   | 0.33 | 0.25 | ND   | ND   | ND   | 0.25 | 1.33 |
| gi348174801 | 0.03 | 0.02 | ND   | ND   | 0.04 | 0.03 | 0.02 | ND   | ND   | 0.05 | 0.83 |
| gi348174999 | 0.09 | 0.20 | 0.69 | 0.17 | 1.14 | 0.26 | 0.14 | 0.80 | 0.31 | 1.51 | 0.75 |
| gi348173901 | 0.10 | ND   | ND   | ND   | 0.10 | 0.10 | ND   | ND   | ND   | 0.10 | 1.00 |
| gi348173921 | 0.02 | 0.04 | ND   | ND   | 0.06 | 0.04 | 0.06 | ND   | ND   | 0.10 | 0.60 |
| gi348174862 | 0.01 | 0.04 | ND   | ND   | 0.05 | 0.01 | 0.03 | ND   | ND   | 0.04 | 1.33 |
| gi348173494 | 0.04 | 0.08 | ND   | ND   | 0.13 | 0.03 | 0.06 | ND   | ND   | 0.08 | 1.50 |
| gi348175410 | 0.02 | 0.01 | ND   | ND   | 0.03 | 0.03 | 0.03 | ND   | ND   | 0.06 | 0.56 |
| gi348169304 | 0.05 | 0.15 | 0.11 | ND   | 0.31 | 0.16 | 0.07 | 0.04 | ND   | 0.27 | 1.13 |
| gi348169399 | 0.02 | 0.05 | ND   | ND   | 0.07 | 0.02 | 0.02 | ND   | ND   | 0.04 | 1.80 |
| gi348176801 | 0.03 | ND   | ND   | ND   | 0.03 | 0.05 | ND   | ND   | ND   | 0.05 | 0.60 |
| gi348169196 | 0.06 | 0.08 | 0.06 | ND   | 0.19 | 0.08 | 0.08 | 0.06 | ND   | 0.21 | 0.91 |
| gi348169427 | 0.04 | ND   | ND   | ND   | 0.04 | 0.02 | ND   | ND   | ND   | 0.02 | 1.50 |
| gi348174401 | 0.02 | 0.09 | 0.01 | ND   | 0.13 | 0.06 | 0.06 | 0.01 | ND   | 0.13 | 0.94 |
| gi348174183 | 0.04 | ND   | ND   | ND   | 0.04 | 0.03 | ND   | ND   | ND   | 0.03 | 1.50 |
| gi348174017 | 0.05 | ND   | ND   | ND   | 0.05 | 0.07 | ND   | ND   | ND   | 0.07 | 0.75 |
| gi348169182 | 0.05 | 0.05 | ND   | ND   | 0.09 | 0.05 | 0.08 | ND   | ND   | 0.12 | 0.75 |
| gi348175111 | 0.08 | ND   | ND   | ND   | 0.08 | 0.13 | ND   | ND   | ND   | 0.13 | 0.60 |
| gi348172915 | 0.30 | 0.40 | ND   | 0.30 | 1.00 | 0.50 | 0.60 | ND   | 0.20 | 1.30 | 0.77 |



|             |      |      |      |      |      |      |      |      |      |      |      |
|-------------|------|------|------|------|------|------|------|------|------|------|------|
| gi348169559 | 0.09 | ND   | ND   | ND   | 0.09 | 0.17 | ND   | ND   | ND   | 0.17 | 0.50 |
| gi348174033 | 0.19 | 0.25 | 0.13 | ND   | 0.56 | 0.25 | 0.38 | 0.13 | ND   | 0.75 | 0.75 |
| gi348173524 | 0.16 | 0.26 | ND   | ND   | 0.42 | 0.21 | 0.58 | ND   | ND   | 0.79 | 0.53 |
| gi348173156 | 0.06 | ND   | ND   | ND   | 0.06 | 0.06 | ND   | ND   | ND   | 0.06 | 1.00 |
| gi348173376 | 0.05 | ND   | ND   | ND   | 0.05 | 0.06 | ND   | ND   | ND   | 0.06 | 0.75 |
| gi348176410 | 0.05 | ND   | ND   | ND   | 0.05 | 0.04 | ND   | ND   | ND   | 0.04 | 1.50 |
| gi348169423 | 0.06 | 0.11 | ND   | ND   | 0.17 | 0.04 | 0.08 | ND   | ND   | 0.11 | 1.50 |
| gi348173516 | 0.05 | ND   | ND   | ND   | 0.05 | 0.03 | ND   | ND   | ND   | 0.03 | 1.50 |
| gi348171861 | 0.03 | ND   | ND   | ND   | 0.03 | 0.03 | ND   | ND   | ND   | 0.03 | 0.75 |
| gi348171815 | 0.04 | 0.05 | ND   | ND   | 0.09 | 0.04 | 0.06 | ND   | ND   | 0.10 | 0.87 |
| gi348172073 | 0.18 | ND   | ND   | ND   | 0.18 | 0.18 | ND   | ND   | ND   | 0.18 | 1.00 |
| gi348174600 | 0.12 | ND   | ND   | ND   | 0.12 | 0.20 | ND   | ND   | ND   | 0.20 | 0.60 |
| gi348175308 | 0.07 | ND   | 0.12 | ND   | 0.19 | 0.12 | ND   | 0.07 | ND   | 0.19 | 1.00 |
| gi348170889 | 0.06 | 0.12 | ND   | ND   | 0.18 | 0.04 | 0.16 | ND   | ND   | 0.20 | 0.90 |
| gi348172514 | 0.05 | ND   | ND   | ND   | 0.05 | 0.03 | ND   | ND   | ND   | 0.03 | 1.50 |
| gi348171154 | 0.13 | 0.38 | 0.58 | ND   | 1.08 | 0.29 | 0.29 | 0.50 | ND   | 1.08 | 1.00 |
| gi348171386 | 0.06 | ND   | ND   | ND   | 0.06 | 0.04 | ND   | ND   | ND   | 0.04 | 1.50 |
| gi348174856 | 0.04 | 0.10 | ND   | ND   | 0.15 | 0.03 | 0.03 | ND   | ND   | 0.06 | 2.50 |
| gi348173217 | 0.12 | ND   | ND   | ND   | 0.12 | 0.12 | ND   | ND   | ND   | 0.12 | 1.00 |
| gi348169130 | 0.06 | 0.16 | ND   | ND   | 0.22 | 0.06 | 0.08 | ND   | ND   | 0.14 | 1.57 |
| gi348169493 | 0.06 | ND   | ND   | ND   | 0.06 | 0.06 | ND   | ND   | ND   | 0.06 | 1.00 |
| gi348176774 | 0.07 | ND   | ND   | ND   | 0.07 | 0.07 | ND   | ND   | ND   | 0.07 | 1.00 |
| gi348176688 | 0.07 | 0.09 | ND   | ND   | 0.16 | 0.05 | 0.11 | ND   | ND   | 0.16 | 1.00 |
| gi348176913 | 0.11 | ND   | ND   | ND   | 0.11 | 0.15 | ND   | ND   | ND   | 0.15 | 0.75 |
| gi348171181 | 0.09 | 0.24 | ND   | 0.12 | 0.45 | 0.09 | 0.15 | ND   | 0.06 | 0.30 | 1.50 |

|             |      |      |      |      |      |      |      |      |      |      |      |
|-------------|------|------|------|------|------|------|------|------|------|------|------|
| gi41350154  | 0.16 | ND   | ND   | ND   | 0.16 | 0.11 | ND   | ND   | ND   | 0.11 | 1.50 |
| gi348173013 | 0.14 | ND   | 0.14 | 0.09 | 0.36 | 0.23 | ND   | 0.18 | 0.14 | 0.55 | 0.67 |
| gi348175006 | 0.19 | ND   | ND   | ND   | 0.19 | 0.19 | ND   | ND   | ND   | 0.19 | 1.00 |
| gi348175348 | 0.15 | ND   | ND   | ND   | 0.15 | 0.15 | ND   | ND   | ND   | 0.15 | 1.00 |
| gi348171621 | 0.06 | 0.04 | ND   | ND   | 0.10 | 0.06 | 0.04 | ND   | ND   | 0.10 | 1.00 |
| gi348175714 | 0.08 | 0.08 | ND   | ND   | 0.16 | 0.08 | 0.16 | ND   | ND   | 0.24 | 0.67 |
| gi348170905 | 0.30 | ND   | ND   | ND   | 0.30 | 0.30 | ND   | ND   | ND   | 0.30 | 1.00 |
| gi348170087 | 0.30 | 0.80 | ND   | ND   | 1.10 | 0.60 | 0.60 | ND   | ND   | 1.20 | 0.92 |
| gi348169138 | 0.06 | 0.04 | ND   | ND   | 0.09 | 0.04 | 0.04 | ND   | ND   | 0.08 | 1.25 |
| gi348172470 | 0.38 | 0.63 | 2.13 | ND   | 3.13 | 0.25 | 0.38 | 2.63 | ND   | 3.25 | 0.96 |
| gi348171760 | 0.07 | ND   | 0.07 | ND   | 0.15 | 0.07 | ND   | 0.10 | ND   | 0.17 | 0.86 |
| gi348176513 | 0.06 | 0.04 | ND   | ND   | 0.10 | 0.08 | 0.04 | ND   | ND   | 0.13 | 0.83 |
| gi348176386 | 0.01 | ND   | ND   | ND   | 0.01 | 0.01 | ND   | ND   | ND   | 0.01 | 0.67 |
| gi348169048 | 0.02 | 0.04 | ND   | ND   | 0.06 | 0.02 | 0.04 | ND   | ND   | 0.06 | 1.00 |
| gi348170950 | 0.03 | ND   | ND   | ND   | 0.03 | 0.03 | ND   | ND   | ND   | 0.03 | 1.00 |
| gi348171475 | 0.01 | ND   | ND   | ND   | 0.01 | 0.02 | ND   | ND   | ND   | 0.02 | 0.67 |
| gi348169250 | 0.03 | ND   | ND   | ND   | 0.03 | 0.03 | ND   | ND   | ND   | 0.03 | 1.00 |
| gi348170155 | 0.02 | 0.15 | ND   | 0.02 | 0.19 | 0.08 | 0.08 | ND   | 0.05 | 0.20 | 0.94 |
| gi348173729 | 0.02 | ND   | ND   | ND   | 0.02 | 0.04 | ND   | ND   | ND   | 0.04 | 0.50 |
| gi348171483 | 0.04 | ND   | ND   | ND   | 0.04 | 0.04 | ND   | ND   | ND   | 0.04 | 1.00 |
| gi348176681 | 0.02 | ND   | ND   | ND   | 0.02 | 0.02 | ND   | ND   | ND   | 0.02 | 1.00 |
| gi348169184 | 0.02 | ND   | ND   | ND   | 0.02 | 0.03 | ND   | ND   | ND   | 0.03 | 0.67 |
| gi348169366 | 0.02 | ND   | ND   | ND   | 0.02 | 0.02 | ND   | ND   | ND   | 0.02 | 1.00 |
| gi348172987 | 0.07 | 0.14 | ND   | ND   | 0.21 | 0.10 | 0.17 | ND   | ND   | 0.28 | 0.75 |
| gi348176493 | 0.04 | ND   | ND   | ND   | 0.04 | 0.04 | ND   | ND   | ND   | 0.04 | 1.00 |

|             |      |      |      |      |      |      |      |      |      |      |      |
|-------------|------|------|------|------|------|------|------|------|------|------|------|
| gi348173037 | 0.03 | ND   | ND   | ND   | 0.03 | 0.06 | ND   | ND   | ND   | 0.06 | 0.50 |
| gi348174196 | 0.06 | ND   | ND   | ND   | 0.06 | 0.06 | ND   | ND   | ND   | 0.06 | 1.00 |
| gi348169478 | 0.04 | 0.09 | ND   | ND   | 0.13 | 0.11 | 0.16 | ND   | ND   | 0.27 | 0.47 |
| gi348175427 | 0.02 | ND   | ND   | ND   | 0.02 | 0.02 | ND   | ND   | ND   | 0.02 | 1.00 |
| gi348174848 | 0.04 | 0.07 | ND   | ND   | 0.11 | 0.05 | 0.04 | ND   | ND   | 0.09 | 1.20 |
| gi348175786 | 0.05 | ND   | ND   | ND   | 0.05 | 0.05 | ND   | ND   | ND   | 0.05 | 1.00 |
| gi348169411 | 0.05 | ND   | ND   | ND   | 0.05 | 0.07 | ND   | ND   | ND   | 0.07 | 0.67 |
| gi348168994 | 0.12 | 1.12 | 0.35 | 0.29 | 1.88 | 0.29 | 1.18 | 0.41 | 0.29 | 2.18 | 0.86 |
| gi348176427 | 0.05 | ND   | ND   | ND   | 0.05 | 0.10 | ND   | ND   | ND   | 0.10 | 0.50 |
| gi348169468 | 0.03 | ND   | ND   | ND   | 0.03 | 0.05 | ND   | ND   | ND   | 0.05 | 0.50 |
| gi348175266 | 0.03 | ND   | ND   | ND   | 0.03 | 0.03 | ND   | ND   | ND   | 0.03 | 1.00 |
| gi348174422 | 0.04 | 0.04 | ND   | ND   | 0.08 | 0.06 | 0.06 | ND   | ND   | 0.11 | 0.67 |
| gi348171421 | 0.02 | ND   | ND   | ND   | 0.02 | 0.05 | ND   | ND   | ND   | 0.05 | 0.50 |
| gi348171470 | 0.15 | 0.31 | ND   | ND   | 0.46 | 0.31 | 0.15 | ND   | ND   | 0.46 | 1.00 |
| gi348172068 | 0.02 | ND   | ND   | ND   | 0.02 | 0.02 | ND   | ND   | ND   | 0.02 | 1.00 |
| gi348170154 | 0.03 | ND   | ND   | ND   | 0.03 | 0.06 | ND   | ND   | ND   | 0.06 | 0.50 |
| gi348176888 | 0.03 | 0.03 | ND   | ND   | 0.06 | 0.04 | 0.08 | ND   | ND   | 0.13 | 0.44 |
| gi348169075 | 0.04 | ND   | ND   | ND   | 0.04 | 0.06 | ND   | ND   | ND   | 0.06 | 0.67 |
| gi348173610 | 0.04 | ND   | ND   | ND   | 0.04 | 0.04 | ND   | ND   | ND   | 0.04 | 1.00 |
| gi348170978 | 0.04 | ND   | ND   | ND   | 0.04 | 0.07 | ND   | ND   | ND   | 0.07 | 0.67 |
| gi348174850 | 0.03 | 0.06 | 0.05 | ND   | 0.14 | 0.03 | 0.03 | 0.03 | ND   | 0.09 | 1.50 |
| gi348172575 | 0.02 | ND   | ND   | ND   | 0.02 | 0.02 | ND   | ND   | ND   | 0.02 | 1.00 |
| gi348174847 | 0.11 | ND   | ND   | ND   | 0.11 | 0.11 | ND   | ND   | ND   | 0.11 | 1.00 |
| gi348171464 | 0.07 | 0.14 | ND   | ND   | 0.21 | 0.07 | 0.18 | ND   | ND   | 0.25 | 0.86 |
| gi348174188 | 0.18 | 0.18 | 0.27 | ND   | 0.64 | 0.27 | 0.27 | 0.18 | ND   | 0.73 | 0.88 |

|             |      |      |      |      |      |      |      |      |      |      |      |
|-------------|------|------|------|------|------|------|------|------|------|------|------|
| gi348175009 | 0.08 | 0.21 | 0.08 | ND   | 0.38 | 0.21 | 0.29 | 0.13 | ND   | 0.63 | 0.60 |
| gi348173303 | 0.04 | ND   | ND   | ND   | 0.04 | 0.04 | ND   | ND   | ND   | 0.04 | 1.00 |
| gi348175005 | 0.06 | ND   | ND   | ND   | 0.06 | 0.12 | ND   | ND   | ND   | 0.12 | 0.50 |
| gi348174959 | 0.03 | ND   | ND   | ND   | 0.03 | 0.05 | ND   | ND   | ND   | 0.05 | 0.50 |
| gi348170606 | 0.05 | ND   | ND   | ND   | 0.05 | 0.05 | ND   | ND   | ND   | 0.05 | 1.00 |
| gi348176150 | 0.03 | ND   | ND   | ND   | 0.03 | 0.05 | ND   | ND   | ND   | 0.05 | 0.67 |
| gi348169323 | 0.03 | ND   | ND   | ND   | 0.03 | 0.03 | ND   | ND   | ND   | 0.03 | 1.00 |
| gi348172629 | 0.09 | ND   | ND   | ND   | 0.09 | 0.09 | ND   | ND   | ND   | 0.09 | 1.00 |
| gi348169303 | 0.04 | ND   | ND   | ND   | 0.04 | 0.08 | ND   | ND   | ND   | 0.08 | 0.50 |
| gi348169292 | 0.05 | 0.09 | ND   | ND   | 0.14 | 0.05 | 0.05 | ND   | ND   | 0.09 | 1.50 |
| gi348173898 | 0.02 | ND   | ND   | ND   | 0.02 | 0.04 | ND   | ND   | ND   | 0.04 | 0.40 |
| gi348176720 | 0.13 | ND   | ND   | ND   | 0.13 | 0.13 | ND   | ND   | ND   | 0.13 | 1.00 |
| gi348176391 | 0.03 | ND   | ND   | ND   | 0.03 | 0.03 | ND   | ND   | ND   | 0.03 | 1.00 |
| gi348176950 | 0.11 | ND   | ND   | ND   | 0.11 | 0.11 | ND   | ND   | ND   | 0.11 | 1.00 |
| gi348171656 | 0.02 | ND   | ND   | 0.02 | 0.04 | 0.03 | ND   | ND   | 0.02 | 0.05 | 0.80 |
| gi348174639 | 0.03 | 0.07 | ND   | ND   | 0.10 | 0.03 | 0.04 | ND   | ND   | 0.07 | 1.40 |
| gi348169816 | 0.10 | 0.20 | 0.10 | 0.15 | 0.55 | 0.10 | 0.20 | 0.10 | 0.25 | 0.65 | 0.85 |
| gi348176472 | 0.05 | ND   | ND   | ND   | 0.05 | 0.05 | ND   | ND   | ND   | 0.05 | 1.00 |
| gi348170553 | 0.10 | ND   | ND   | ND   | 0.10 | 0.10 | ND   | ND   | ND   | 0.10 | 1.00 |
| gi348169762 | 0.20 | ND   | ND   | ND   | 0.20 | 0.40 | ND   | ND   | ND   | 0.40 | 0.50 |
| gi348170112 | 0.14 | ND   | 0.14 | ND   | 0.29 | 0.14 | ND   | 0.21 | ND   | 0.36 | 0.80 |
| gi348174970 | 0.22 | ND   | ND   | ND   | 0.22 | 0.44 | ND   | ND   | ND   | 0.44 | 0.50 |
| gi348172418 | 0.03 | ND   | ND   | ND   | 0.03 | 0.05 | ND   | ND   | ND   | 0.05 | 0.67 |
| gi348170663 | 0.10 | ND   | ND   | ND   | 0.10 | 0.15 | ND   | ND   | ND   | 0.15 | 0.67 |
| gi348170246 | 0.04 | 0.28 | 0.09 | ND   | 0.41 | 0.04 | 0.17 | 0.04 | ND   | 0.26 | 1.58 |

|             |      |      |      |      |      |      |      |      |      |      |      |
|-------------|------|------|------|------|------|------|------|------|------|------|------|
| gi348168933 | 0.11 | ND   | ND   | ND   | 0.11 | 0.11 | ND   | ND   | ND   | 0.11 | 1.00 |
| gi348170891 | 0.04 | ND   | ND   | ND   | 0.04 | 0.05 | ND   | ND   | ND   | 0.05 | 0.67 |
| gi348171411 | 0.03 | 0.08 | 0.06 | 0.05 | 0.23 | 0.03 | 0.06 | 0.05 | 0.03 | 0.18 | 1.27 |
| gi348176889 | 0.04 | 0.10 | ND   | ND   | 0.14 | 0.04 | 0.12 | ND   | ND   | 0.16 | 0.88 |
| gi348175191 | 0.05 | 0.19 | 0.11 | 0.05 | 0.41 | 0.05 | 0.08 | 0.11 | 0.14 | 0.38 | 1.07 |
| gi348174143 | 0.22 | ND   | ND   | ND   | 0.22 | 0.22 | ND   | ND   | ND   | 0.22 | 1.00 |
| gi348168923 | 0.07 | ND   | ND   | ND   | 0.07 | 0.10 | ND   | ND   | ND   | 0.10 | 0.67 |
| gi348170898 | 0.09 | 0.09 | 0.23 | ND   | 0.41 | 0.09 | 0.09 | 0.18 | ND   | 0.36 | 1.13 |
| gi348169093 | 0.15 | ND   | ND   | ND   | 0.15 | 0.23 | ND   | ND   | ND   | 0.23 | 0.67 |
| gi348174960 | 0.03 | 0.04 | 0.03 | ND   | 0.09 | 0.03 | 0.04 | 0.03 | ND   | 0.09 | 1.00 |
| gi348175212 | 0.03 | 0.04 | ND   | ND   | 0.07 | 0.03 | 0.03 | ND   | ND   | 0.06 | 1.25 |
| gi348172422 | 0.04 | ND   | ND   | ND   | 0.04 | 0.05 | ND   | ND   | ND   | 0.05 | 0.67 |
| gi348175326 | 0.18 | ND   | ND   | ND   | 0.18 | 0.18 | ND   | ND   | ND   | 0.18 | 1.00 |
| gi348172330 | 0.07 | ND   | ND   | ND   | 0.07 | 0.17 | ND   | ND   | ND   | 0.17 | 0.40 |
| gi348173021 | 0.17 | ND   | ND   | ND   | 0.17 | 0.17 | ND   | ND   | ND   | 0.17 | 1.00 |
| gi348172486 | 0.02 | ND   | ND   | ND   | 0.02 | 0.03 | ND   | ND   | ND   | 0.03 | 0.67 |
| gi348168939 | 0.13 | 0.20 | ND   | ND   | 0.33 | 0.13 | 0.13 | ND   | ND   | 0.27 | 1.25 |
| gi348169600 | 0.03 | ND   | ND   | ND   | 0.03 | 0.05 | ND   | ND   | ND   | 0.05 | 0.67 |
| gi348174322 | ND   | 0.57 | 1.51 | 1.67 | 3.75 | ND   | 0.46 | 1.74 | 1.61 | 3.81 | 0.98 |
| gi348174073 | ND   | 0.36 | 0.27 | ND   | 0.64 | ND   | 0.20 | 0.11 | ND   | 0.31 | 2.04 |
| gi348174398 | ND   | 0.37 | ND   | ND   | 0.37 | ND   | 0.32 | ND   | ND   | 0.32 | 1.15 |
| gi348174441 | ND   | 0.23 | ND   | ND   | 0.23 | ND   | 0.28 | ND   | ND   | 0.28 | 0.85 |
| gi348174427 | ND   | 0.33 | ND   | ND   | 0.33 | ND   | 0.34 | ND   | ND   | 0.34 | 0.95 |
| gi348171388 | ND   | 0.20 | 0.04 | ND   | 0.24 | ND   | 0.04 | 0.05 | ND   | 0.10 | 2.44 |
| gi348175578 | ND   | 0.35 | 0.04 | ND   | 0.38 | ND   | 0.25 | 0.08 | ND   | 0.33 | 1.18 |

|             |    |      |      |      |      |    |      |      |      |      |      |
|-------------|----|------|------|------|------|----|------|------|------|------|------|
| gi348174443 | ND | 0.16 | 0.04 | ND   | 0.19 | ND | 0.10 | 0.04 | ND   | 0.14 | 1.40 |
| gi348169788 | ND | 0.88 | ND   | ND   | 0.88 | ND | 1.47 | ND   | ND   | 1.47 | 0.60 |
| gi348175259 | ND | 0.08 | 0.02 | ND   | 0.10 | ND | 0.05 | 0.02 | ND   | 0.07 | 1.50 |
| gi348171497 | ND | 0.15 | ND   | 0.15 | 0.31 | ND | 0.11 | ND   | 0.28 | 0.39 | 0.79 |
| gi348171177 | ND | 0.32 | 0.91 | 1.06 | 2.29 | ND | 0.38 | 0.38 | 1.09 | 1.85 | 1.24 |
| gi348175493 | ND | 0.29 | ND   | 0.09 | 0.37 | ND | 0.14 | ND   | 0.09 | 0.23 | 1.63 |
| gi348175789 | ND | 0.24 | ND   | ND   | 0.24 | ND | 0.10 | ND   | ND   | 0.10 | 2.50 |
| gi13443724  | ND | 0.01 | ND   | ND   | 0.01 | ND | 0.01 | ND   | ND   | 0.01 | 0.89 |
| gi348170633 | ND | 0.22 | ND   | 0.08 | 0.30 | ND | 0.30 | ND   | 0.05 | 0.35 | 0.85 |
| gi348175811 | ND | 0.18 | 0.04 | ND   | 0.22 | ND | 0.24 | 0.09 | ND   | 0.33 | 0.67 |
| gi348173410 | ND | 0.15 | ND   | ND   | 0.15 | ND | 0.13 | ND   | ND   | 0.13 | 1.14 |
| gi348174946 | ND | 0.35 | 0.35 | 0.30 | 1.00 | ND | 0.43 | 0.39 | 0.13 | 0.96 | 1.05 |
| gi348176202 | ND | 0.10 | 0.09 | 0.05 | 0.24 | ND | 0.10 | 0.09 | 0.05 | 0.24 | 1.00 |
| gi348171256 | ND | 0.05 | ND   | 0.01 | 0.06 | ND | 0.05 | ND   | 0.01 | 0.07 | 0.90 |
| gi348176712 | ND | 0.14 | ND   | ND   | 0.14 | ND | 0.27 | ND   | ND   | 0.27 | 0.54 |
| gi348169116 | ND | 0.14 | ND   | ND   | 0.14 | ND | 0.06 | ND   | ND   | 0.06 | 2.33 |
| gi348175407 | ND | 0.09 | 0.07 | ND   | 0.16 | ND | 0.08 | 0.08 | ND   | 0.16 | 1.00 |
| gi348169280 | ND | 0.18 | ND   | ND   | 0.18 | ND | 0.16 | ND   | ND   | 0.16 | 1.17 |
| gi348169669 | ND | 0.12 | 0.12 | 0.21 | 0.45 | ND | 0.10 | 0.05 | 0.33 | 0.48 | 0.93 |
| gi348172929 | ND | 0.18 | ND   | ND   | 0.18 | ND | 0.12 | ND   | ND   | 0.12 | 1.50 |
| gi348169571 | ND | 0.04 | ND   | ND   | 0.04 | ND | 0.03 | ND   | ND   | 0.03 | 1.50 |
| gi348176522 | ND | 0.09 | ND   | ND   | 0.09 | ND | 0.03 | ND   | ND   | 0.03 | 3.00 |
| gi348174447 | ND | 0.08 | ND   | ND   | 0.08 | ND | 0.03 | ND   | ND   | 0.03 | 3.00 |
| gi348175480 | ND | 0.10 | ND   | ND   | 0.10 | ND | 0.03 | ND   | ND   | 0.03 | 3.00 |
| gi348174072 | ND | 0.14 | 0.14 | 0.07 | 0.35 | ND | 0.05 | 0.30 | 0.09 | 0.44 | 0.79 |

|             |    |      |      |      |      |    |      |      |      |      |      |
|-------------|----|------|------|------|------|----|------|------|------|------|------|
| gi348175152 | ND | 0.25 | ND   | ND   | 0.25 | ND | 0.08 | ND   | ND   | 0.08 | 3.00 |
| gi348170279 | ND | 0.11 | ND   | ND   | 0.11 | ND | 0.09 | ND   | ND   | 0.09 | 1.20 |
| gi348174008 | ND | 0.10 | ND   | ND   | 0.10 | ND | 0.03 | ND   | ND   | 0.03 | 3.00 |
| gi348171327 | ND | 0.13 | ND   | ND   | 0.13 | ND | 0.11 | ND   | ND   | 0.11 | 1.20 |
| gi41350157  | ND | 0.01 | ND   | ND   | 0.01 | ND | 0.01 | ND   | ND   | 0.01 | 0.83 |
| gi13162634  | ND | 0.01 | ND   | ND   | 0.01 | ND | 0.01 | ND   | ND   | 0.01 | 0.71 |
| gi348171762 | ND | 0.06 | ND   | ND   | 0.06 | ND | 0.08 | ND   | ND   | 0.08 | 0.71 |
| gi348170590 | ND | 0.07 | ND   | ND   | 0.07 | ND | 0.03 | ND   | ND   | 0.03 | 2.50 |
| gi348173935 | ND | 0.03 | ND   | ND   | 0.03 | ND | 0.05 | ND   | ND   | 0.05 | 0.63 |
| gi348174974 | ND | 0.12 | 0.05 | ND   | 0.17 | ND | 0.07 | 0.05 | ND   | 0.12 | 1.40 |
| gi348174715 | ND | 0.07 | ND   | ND   | 0.07 | ND | 0.03 | ND   | ND   | 0.03 | 2.50 |
| gi348170555 | ND | 0.04 | ND   | ND   | 0.04 | ND | 0.02 | ND   | ND   | 0.02 | 2.50 |
| gi348176267 | ND | 0.06 | 0.05 | 0.03 | 0.14 | ND | 0.06 | 0.05 | 0.04 | 0.15 | 0.92 |
| gi348175498 | ND | 0.24 | ND   | 0.29 | 0.52 | ND | 0.14 | ND   | 0.10 | 0.24 | 2.20 |
| gi348176049 | ND | 0.15 | ND   | ND   | 0.15 | ND | 0.06 | ND   | ND   | 0.06 | 2.50 |
| gi348174853 | ND | 0.45 | 0.45 | ND   | 0.91 | ND | 1.09 | 0.45 | ND   | 1.55 | 0.59 |
| gi348172595 | ND | 0.33 | ND   | 0.13 | 0.47 | ND | 0.27 | ND   | 0.20 | 0.47 | 1.00 |
| gi348172023 | ND | 0.02 | ND   | ND   | 0.02 | ND | 0.02 | ND   | ND   | 0.02 | 1.33 |
| gi348169456 | ND | 0.04 | ND   | ND   | 0.04 | ND | 0.02 | ND   | ND   | 0.02 | 2.00 |
| gi348174832 | ND | 0.06 | ND   | ND   | 0.06 | ND | 0.13 | ND   | ND   | 0.13 | 0.44 |
| gi348172827 | ND | 0.04 | ND   | ND   | 0.04 | ND | 0.04 | ND   | ND   | 0.04 | 1.00 |
| gi348171488 | ND | 0.16 | ND   | ND   | 0.16 | ND | 0.16 | ND   | ND   | 0.16 | 1.00 |
| gi348176838 | ND | 0.03 | ND   | ND   | 0.03 | ND | 0.05 | ND   | ND   | 0.05 | 0.67 |
| gi348171517 | ND | 0.06 | ND   | ND   | 0.06 | ND | 0.06 | ND   | ND   | 0.06 | 1.00 |
| gi348175720 | ND | 0.07 | ND   | 0.04 | 0.11 | ND | 0.04 | ND   | 0.04 | 0.07 | 1.50 |

|             |    |      |      |      |      |    |      |      |      |      |      |
|-------------|----|------|------|------|------|----|------|------|------|------|------|
| gi348174420 | ND | 0.06 | ND   | ND   | 0.06 | ND | 0.11 | ND   | ND   | 0.11 | 0.57 |
| gi348173014 | ND | 0.05 | ND   | ND   | 0.05 | ND | 0.02 | ND   | ND   | 0.02 | 2.00 |
| gi348171067 | ND | 0.20 | ND   | ND   | 0.20 | ND | 0.15 | ND   | ND   | 0.15 | 1.33 |
| gi348174887 | ND | 0.07 | ND   | ND   | 0.07 | ND | 0.05 | ND   | ND   | 0.05 | 1.33 |
| gi348173941 | ND | 0.13 | 0.10 | ND   | 0.23 | ND | 0.07 | 0.07 | ND   | 0.13 | 1.75 |
| gi348172406 | ND | 0.02 | 0.06 | 0.06 | 0.14 | ND | 0.06 | 0.02 | 0.05 | 0.13 | 1.13 |
| gi348176978 | ND | 0.04 | ND   | ND   | 0.04 | ND | 0.03 | ND   | ND   | 0.03 | 1.50 |
| gi348175495 | ND | 0.09 | ND   | ND   | 0.09 | ND | 0.06 | ND   | ND   | 0.06 | 1.50 |
| gi348169385 | ND | 0.02 | ND   | ND   | 0.02 | ND | 0.01 | ND   | ND   | 0.01 | 1.50 |
| gi348175208 | ND | 0.16 | ND   | ND   | 0.16 | ND | 0.21 | ND   | ND   | 0.21 | 0.75 |
| gi348169496 | ND | 0.04 | ND   | 0.04 | 0.09 | ND | 0.10 | ND   | 0.06 | 0.16 | 0.55 |
| gi348169071 | ND | 0.05 | ND   | ND   | 0.05 | ND | 0.05 | ND   | ND   | 0.05 | 1.00 |
| gi348172451 | ND | 0.03 | ND   | ND   | 0.03 | ND | 0.02 | ND   | ND   | 0.02 | 1.50 |
| gi348172772 | ND | 0.03 | 0.06 | ND   | 0.09 | ND | 0.02 | 0.03 | ND   | 0.06 | 1.60 |
| gi348174230 | ND | 0.03 | 0.02 | ND   | 0.05 | ND | 0.02 | 0.02 | ND   | 0.04 | 1.25 |
| gi348171446 | ND | 0.06 | ND   | ND   | 0.06 | ND | 0.16 | ND   | ND   | 0.16 | 0.38 |
| gi348170169 | ND | 0.03 | ND   | ND   | 0.03 | ND | 0.02 | ND   | ND   | 0.02 | 1.50 |
| gi348174981 | ND | 0.05 | ND   | ND   | 0.05 | ND | 0.03 | ND   | ND   | 0.03 | 1.50 |
| gi348170192 | ND | 0.04 | ND   | ND   | 0.04 | ND | 0.04 | ND   | ND   | 0.04 | 1.00 |
| gi348173493 | ND | 0.06 | ND   | ND   | 0.06 | ND | 0.15 | ND   | ND   | 0.15 | 0.43 |
| gi348173172 | ND | 0.10 | ND   | ND   | 0.10 | ND | 0.10 | ND   | ND   | 0.10 | 1.00 |
| gi348174995 | ND | 0.09 | ND   | ND   | 0.09 | ND | 0.18 | ND   | ND   | 0.18 | 0.50 |
| gi15077645  | ND | 0.07 | ND   | ND   | 0.07 | ND | 0.11 | ND   | ND   | 0.11 | 0.60 |
| gi348169535 | ND | 0.06 | ND   | ND   | 0.06 | ND | 0.12 | ND   | ND   | 0.12 | 0.50 |
| gi348172882 | ND | 0.08 | 0.05 | ND   | 0.14 | ND | 0.14 | 0.11 | ND   | 0.24 | 0.56 |



|             |    |      |      |      |      |    |      |      |      |      |      |
|-------------|----|------|------|------|------|----|------|------|------|------|------|
| gi348169797 | ND | 0.09 | ND   | 0.09 | 0.19 | ND | 0.06 | ND   | 0.09 | 0.16 | 1.20 |
| gi348170394 | ND | 0.05 | ND   | ND   | 0.05 | ND | 0.11 | ND   | ND   | 0.11 | 0.40 |
| gi348175892 | ND | 0.06 | ND   | ND   | 0.06 | ND | 0.12 | ND   | ND   | 0.12 | 0.50 |
| gi348172766 | ND | 0.01 | 0.01 | ND   | 0.02 | ND | 0.02 | 0.01 | ND   | 0.03 | 0.57 |
| gi348174195 | ND | 0.01 | ND   | ND   | 0.01 | ND | 0.02 | ND   | ND   | 0.02 | 0.67 |
| gi348172988 | ND | 0.01 | ND   | ND   | 0.01 | ND | 0.01 | ND   | ND   | 0.01 | 1.00 |
| gi348172327 | ND | 0.07 | ND   | 0.07 | 0.14 | ND | 0.14 | ND   | 0.07 | 0.21 | 0.67 |
| gi348170151 | ND | 0.01 | ND   | 0.01 | 0.03 | ND | 0.02 | ND   | 0.01 | 0.03 | 0.80 |
| gi348176568 | ND | 0.02 | ND   | ND   | 0.02 | ND | 0.02 | ND   | ND   | 0.02 | 1.00 |
| gi348173989 | ND | 0.03 | ND   | ND   | 0.03 | ND | 0.05 | ND   | ND   | 0.05 | 0.50 |
| gi348172906 | ND | 0.03 | 0.03 | 0.06 | 0.12 | ND | 0.05 | 0.03 | 0.03 | 0.11 | 1.14 |
| gi348168954 | ND | 0.03 | ND   | ND   | 0.03 | ND | 0.03 | ND   | ND   | 0.03 | 1.00 |
| gi348169606 | ND | 0.05 | 0.08 | ND   | 0.13 | ND | 0.05 | 0.05 | ND   | 0.11 | 1.25 |
| gi348175088 | ND | 0.06 | ND   | ND   | 0.06 | ND | 0.17 | ND   | ND   | 0.17 | 0.33 |
| gi348172216 | ND | 0.02 | 0.02 | ND   | 0.05 | ND | 0.04 | 0.07 | ND   | 0.11 | 0.44 |
| gi348176694 | ND | 0.05 | ND   | ND   | 0.05 | ND | 0.05 | ND   | ND   | 0.05 | 1.00 |
| gi348176691 | ND | 0.03 | ND   | ND   | 0.03 | ND | 0.03 | ND   | ND   | 0.03 | 1.00 |
| gi348176910 | ND | 0.06 | ND   | ND   | 0.06 | ND | 0.09 | ND   | ND   | 0.09 | 0.67 |
| gi348173149 | ND | 0.05 | ND   | ND   | 0.05 | ND | 0.05 | ND   | ND   | 0.05 | 1.00 |
| gi348172446 | ND | 0.05 | ND   | ND   | 0.05 | ND | 0.05 | ND   | ND   | 0.05 | 1.00 |
| gi348175501 | ND | 0.03 | ND   | ND   | 0.03 | ND | 0.03 | ND   | ND   | 0.03 | 1.00 |
| gi348175822 | ND | 0.11 | ND   | ND   | 0.11 | ND | 0.28 | ND   | ND   | 0.28 | 0.40 |
| gi348170085 | ND | 0.17 | ND   | ND   | 0.17 | ND | 0.42 | ND   | ND   | 0.42 | 0.40 |
| gi348174325 | ND | 0.07 | ND   | 0.07 | 0.14 | ND | 0.07 | ND   | 0.07 | 0.14 | 1.00 |
| gi348170680 | ND | 0.04 | ND   | 0.04 | 0.07 | ND | 0.04 | ND   | 0.07 | 0.11 | 0.67 |

|             |    |      |      |      |      |    |      |      |      |      |      |
|-------------|----|------|------|------|------|----|------|------|------|------|------|
| gi348170646 | ND | 0.03 | ND   | ND   | 0.03 | ND | 0.10 | ND   | ND   | 0.10 | 0.33 |
| gi348171938 | ND | 0.04 | ND   | 0.05 | 0.09 | ND | 0.09 | ND   | 0.05 | 0.15 | 0.63 |
| gi348170134 | ND | 0.12 | ND   | ND   | 0.12 | ND | 0.35 | ND   | ND   | 0.35 | 0.33 |
| gi348171885 | ND | 0.08 | 0.13 | 0.08 | 0.29 | ND | 0.13 | 0.13 | 0.08 | 0.33 | 0.88 |
| gi348169129 | ND | 0.06 | ND   | ND   | 0.06 | ND | 0.12 | ND   | ND   | 0.12 | 0.50 |
| gi348169328 | ND | 0.05 | ND   | ND   | 0.05 | ND | 0.08 | ND   | ND   | 0.08 | 0.67 |
| gi348170184 | ND | 0.03 | ND   | ND   | 0.03 | ND | 0.03 | ND   | ND   | 0.03 | 1.00 |
| gi348175263 | ND | 0.03 | ND   | ND   | 0.03 | ND | 0.05 | ND   | ND   | 0.05 | 0.67 |
| gi348169764 | ND | 0.10 | ND   | 0.10 | 0.20 | ND | 0.10 | ND   | 0.10 | 0.20 | 1.00 |
| gi348170412 | ND | 0.12 | ND   | ND   | 0.12 | ND | 0.24 | ND   | ND   | 0.24 | 0.50 |
| gi348173306 | ND | 0.02 | 0.02 | ND   | 0.04 | ND | 0.02 | 0.04 | ND   | 0.06 | 0.67 |
| gi348176727 | ND | 0.08 | ND   | ND   | 0.08 | ND | 0.08 | ND   | ND   | 0.08 | 1.00 |
| gi348174252 | ND | 0.06 | ND   | ND   | 0.06 | ND | 0.13 | ND   | ND   | 0.13 | 0.50 |
| gi348169421 | ND | 0.04 | ND   | ND   | 0.04 | ND | 0.06 | ND   | ND   | 0.06 | 0.67 |
| gi348171479 | ND | 0.05 | ND   | ND   | 0.05 | ND | 0.07 | ND   | ND   | 0.07 | 0.67 |
| gi348175306 | ND | 0.04 | 0.06 | ND   | 0.10 | ND | 0.08 | 0.04 | ND   | 0.12 | 0.83 |
| gi348171343 | ND | 0.04 | ND   | ND   | 0.04 | ND | 0.04 | ND   | ND   | 0.04 | 1.00 |
| gi348171400 | ND | 0.04 | ND   | ND   | 0.04 | ND | 0.04 | ND   | ND   | 0.04 | 1.00 |
| gi348169181 | ND | 0.13 | ND   | ND   | 0.13 | ND | 0.19 | ND   | ND   | 0.19 | 0.67 |
| gi348174810 | ND | ND   | 1.14 | 5.10 | 6.24 | ND | ND   | 1.38 | 4.14 | 5.52 | 1.13 |
| gi348173379 | ND | ND   | 0.11 | 0.06 | 0.18 | ND | ND   | 0.07 | 0.14 | 0.21 | 0.85 |
| gi348175187 | ND | ND   | 0.20 | ND   | 0.20 | ND | ND   | 0.09 | ND   | 0.09 | 2.25 |
| gi348173035 | ND | ND   | 0.13 | 0.09 | 0.22 | ND | ND   | 0.07 | 0.11 | 0.17 | 1.25 |
| gi348175862 | ND | ND   | 0.06 | ND   | 0.06 | ND | ND   | 0.05 | ND   | 0.05 | 1.25 |
| gi348172037 | ND | ND   | 0.02 | 0.02 | 0.04 | ND | ND   | 0.01 | 0.01 | 0.02 | 1.80 |

|             |    |    |      |      |      |    |    |      |      |      |      |
|-------------|----|----|------|------|------|----|----|------|------|------|------|
| gi348171788 | ND | ND | 0.14 | 0.22 | 0.35 | ND | ND | 0.14 | 0.16 | 0.30 | 1.18 |
| gi348176649 | ND | ND | 0.06 | 0.11 | 0.17 | ND | ND | 0.10 | 0.16 | 0.25 | 0.69 |
| gi348171261 | ND | ND | 0.24 | 0.41 | 0.65 | ND | ND | 0.12 | 0.12 | 0.24 | 2.75 |
| gi348173084 | ND | ND | 0.09 | 0.05 | 0.14 | ND | ND | 0.07 | 0.16 | 0.23 | 0.60 |
| gi348169308 | ND | ND | 0.18 | 0.32 | 0.50 | ND | ND | 0.09 | 0.27 | 0.36 | 1.38 |
| gi348176088 | ND | ND | 0.01 | ND   | 0.01 | ND | ND | 0.02 | ND   | 0.02 | 0.50 |
| gi348174967 | ND | ND | 0.05 | ND   | 0.05 | ND | ND | 0.08 | ND   | 0.08 | 0.60 |
| gi348175283 | ND | ND | 0.06 | 0.04 | 0.10 | ND | ND | 0.04 | 0.06 | 0.10 | 1.00 |
| gi348176499 | ND | ND | 0.05 | ND   | 0.05 | ND | ND | 0.03 | ND   | 0.03 | 1.50 |
| gi348175218 | ND | ND | 0.06 | ND   | 0.06 | ND | ND | 0.04 | ND   | 0.04 | 1.50 |
| gi348175175 | ND | ND | 0.02 | ND   | 0.02 | ND | ND | 0.02 | ND   | 0.02 | 1.00 |
| gi348171164 | ND | ND | 0.02 | ND   | 0.02 | ND | ND | 0.02 | ND   | 0.02 | 0.67 |
| gi348173310 | ND | ND | 0.05 | ND   | 0.05 | ND | ND | 0.05 | ND   | 0.05 | 1.00 |
| gi348171530 | ND | ND | 0.04 | ND   | 0.04 | ND | ND | 0.04 | ND   | 0.04 | 1.00 |
| gi348176883 | ND | ND | 0.03 | 0.04 | 0.06 | ND | ND | 0.03 | 0.03 | 0.05 | 1.25 |
| gi348173225 | ND | ND | 0.02 | 0.02 | 0.03 | ND | ND | 0.02 | 0.02 | 0.03 | 1.00 |
| gi348170280 | ND | ND | 0.04 | ND   | 0.04 | ND | ND | 0.06 | ND   | 0.06 | 0.67 |
| gi348170334 | ND | ND | 0.06 | ND   | 0.06 | ND | ND | 0.06 | ND   | 0.06 | 1.00 |
| gi348176732 | ND | ND | 0.13 | 0.27 | 0.40 | ND | ND | 0.13 | 0.20 | 0.33 | 1.20 |
| gi348173573 | ND | ND | 0.05 | ND   | 0.05 | ND | ND | 0.05 | ND   | 0.05 | 1.00 |
| gi348171383 | ND | ND | 0.05 | ND   | 0.05 | ND | ND | 0.05 | ND   | 0.05 | 1.00 |
| gi348170471 | ND | ND | ND   | 0.17 | 0.17 | ND | ND | ND   | 0.07 | 0.07 | 2.25 |
| gi348171072 | ND | ND | ND   | 0.05 | 0.05 | ND | ND | ND   | 0.07 | 0.07 | 0.83 |
| gi348173105 | ND | ND | ND   | 0.04 | 0.04 | ND | ND | ND   | 0.03 | 0.03 | 1.25 |
| gi348168932 | ND | ND | ND   | 0.13 | 0.13 | ND | ND | ND   | 0.13 | 0.13 | 1.00 |

|             |    |    |    |      |      |    |    |    |      |      |      |
|-------------|----|----|----|------|------|----|----|----|------|------|------|
| gi348171505 | ND | ND | ND | 0.05 | 0.05 | ND | ND | ND | 0.05 | 0.05 | 1.00 |
| gi348170466 | ND | ND | ND | 0.57 | 0.57 | ND | ND | ND | 0.71 | 0.71 | 0.80 |
| gi348172409 | ND | ND | ND | 0.31 | 0.31 | ND | ND | ND | 0.15 | 0.15 | 2.00 |
| gi348176339 | ND | ND | ND | 0.09 | 0.09 | ND | ND | ND | 0.09 | 0.09 | 1.00 |
| gi348174071 | ND | ND | ND | 0.03 | 0.03 | ND | ND | ND | 0.04 | 0.04 | 0.75 |
| gi13162642  | ND | ND | ND | 0.03 | 0.03 | ND | ND | ND | 0.03 | 0.03 | 1.00 |
| gi348175585 | ND | ND | ND | 0.04 | 0.04 | ND | ND | ND | 0.04 | 0.04 | 1.00 |
| gi348169794 | ND | ND | ND | 0.10 | 0.10 | ND | ND | ND | 0.06 | 0.06 | 1.50 |
| gi348171458 | ND | ND | ND | 0.10 | 0.10 | ND | ND | ND | 0.07 | 0.07 | 1.50 |
| gi348176457 | ND | ND | ND | 0.04 | 0.04 | ND | ND | ND | 0.06 | 0.06 | 0.67 |
| gi348172955 | ND | ND | ND | 0.01 | 0.01 | ND | ND | ND | 0.01 | 0.01 | 0.50 |
| gi348174459 | ND | ND | ND | 0.02 | 0.02 | ND | ND | ND | 0.02 | 0.02 | 1.00 |
| gi348175505 | ND | ND | ND | 0.01 | 0.01 | ND | ND | ND | 0.02 | 0.02 | 0.67 |
| gi348168984 | ND | ND | ND | 0.02 | 0.02 | ND | ND | ND | 0.05 | 0.05 | 0.33 |
| gi348171528 | ND | ND | ND | 0.03 | 0.03 | ND | ND | ND | 0.05 | 0.05 | 0.67 |
| gi348174599 | ND | ND | ND | 0.07 | 0.07 | ND | ND | ND | 0.13 | 0.13 | 0.50 |
| gi348169202 | ND | ND | ND | 0.02 | 0.02 | ND | ND | ND | 0.02 | 0.02 | 1.00 |
| gi348170164 | ND | ND | ND | 0.03 | 0.03 | ND | ND | ND | 0.03 | 0.03 | 1.00 |
| gi348170226 | ND | ND | ND | 0.02 | 0.02 | ND | ND | ND | 0.03 | 0.03 | 0.67 |
| gi348176716 | ND | ND | ND | 0.04 | 0.04 | ND | ND | ND | 0.04 | 0.04 | 1.00 |
| gi348171716 | ND | ND | ND | 0.03 | 0.03 | ND | ND | ND | 0.05 | 0.05 | 0.50 |

<sup>a, b</sup> the individual PAI values for each protein from the four time phases were added to determine the  $\Sigma PAI_{BR1}$  and  $\Sigma PAI_{BR2}$  for each of the 689 proteins that were quantified in replicates 1 and 2, respectively. ND, The protein is not detected.

**Table S2 The most abundant proteins in *S. spinosa* (PAI > 3)**

| NCBI NO.    | Protein description                              | Averaged PAI ratios from two biological replicates <sup>a</sup> |       |       |       |       |       | $\Sigma$ PAI value <sup>b</sup> | Function and KEGG <sup>c</sup>   |
|-------------|--------------------------------------------------|-----------------------------------------------------------------|-------|-------|-------|-------|-------|---------------------------------|----------------------------------|
|             |                                                  | T2/T1                                                           | T3/T1 | T4/T1 | T3/T2 | T4/T2 | T4/T3 |                                 |                                  |
| gi348176726 | hypothetical protein SspiN1_40323                | 4.52                                                            | 0.71  | 0.30  | 0.16  | 0.07  | 0.42  | 140.61                          | No classification                |
| gi348173178 | superoxide dismutase [Fe-Zn] 1 (FeSOD I)         | 0.97                                                            | 0.52  | 0.77  | 0.53  | 0.79  | 1.49  | 63.52                           | Peroxisome                       |
| gi348173691 | cold shock protein CspA                          | 0.91                                                            | 0.25  | 0.07  | 0.27  | 0.08  | 0.29  | 38.42                           | Transcription factors            |
| gi348175327 | hypothetical protein SspiN1_33090                | 1.31                                                            | 1.64  | 1.73  | 1.25  | 1.32  | 1.06  | 31.80                           | No classification                |
| gi348176721 | hypothetical protein SspiN1_40298                | 1.73                                                            | ND    | ND    | ND    | ND    | ND    | 28.40                           | No classification                |
| gi348174902 | metallopeptidase                                 | 1.88                                                            | 0.84  | 0.30  | 0.45  | 0.16  | 0.35  | 23.45                           | Catabolism/proteases             |
| gi348174397 | cold-shock DNA-binding domain-containing protein | 0.72                                                            | 0.21  | 0.03  | 0.29  | 0.04  | 0.13  | 21.31                           | Transcription factors            |
| gi348173102 | chaperonin GroEL                                 | 0.98                                                            | 0.19  | 0.09  | 0.19  | 0.09  | 0.48  | 18.53                           | Folding, Sorting and Degradation |
| gi348172783 | hypothetical protein SspiN1_20066                | 1.37                                                            | 1.00  | 0.47  | 0.73  | 0.35  | 0.47  | 18.25                           | No classification                |
| gi348173083 | serine protease precursor                        | 1.72                                                            | 0.33  | 0.21  | 0.19  | 0.12  | 0.63  | 16.26                           | Signal transduction              |
| gi348176443 | hypothetical protein SspiN1_38884                | 1.82                                                            | 0.39  | 0.29  | 0.22  | 0.16  | 0.73  | 15.68                           | No classification                |
| gi348169918 | cold-shock DNA-binding domain-containing protein | 0.54                                                            | 0.18  | 0.10  | 0.33  | 0.19  | 0.58  | 15.38                           | Transcription factors            |
| gi348170335 | zinc binding alcohol dehydrogenase               | 0.74                                                            | 0.13  | 0.05  | 0.17  | 0.07  | 0.43  | 15.05                           | Carbohydrate metabolism          |
| gi348174074 | polysaccharide deacetylase                       | 4.13                                                            | 3.18  | 1.97  | 0.77  | 0.48  | 0.62  | 14.35                           | Carbohydrate metabolism          |
| gi348172319 | cold-shock DNA-binding domain-containing protein | 0.53                                                            | 0.25  | ND    | 0.46  | ND    | ND    | 13.43                           | Transcription factors            |
| gi348176852 | hypothetical protein SspiN1_40990                | 1.62                                                            | 1.88  | 0.81  | 1.16  | 0.50  | 0.43  | 12.39                           | No classification                |
| gi348174864 | hypothetical protein SspiN1_30689                | 0.90                                                            | 0.44  | 0.21  | 0.49  | 0.23  | 0.47  | 12.36                           | No classification                |
| gi348173100 | cold shock protein                               | 0.61                                                            | 0.04  | ND    | 0.07  | ND    | ND    | 12.12                           | Transcription factors            |
| gi348169183 | hypothetical protein SspiN1_01430                | 0.18                                                            | 0.10  | ND    | 0.56  | ND    | ND    | 12.11                           | No classification                |
| gi348176428 | elongation factor Tu                             | 1.45                                                            | 0.50  | 0.35  | 0.34  | 0.24  | 0.70  | 11.87                           | Translation                      |
| gi348174810 | hypothetical protein SspiN1_30419                | ND                                                              | ND    | ND    | ND    | ND    | 3.66  | 11.76                           | No classification                |

|             |                                                                         |      |      |      |      |      |      |       |                                      |
|-------------|-------------------------------------------------------------------------|------|------|------|------|------|------|-------|--------------------------------------|
| gi348171511 | glutamine synthetase                                                    | 3.61 | 1.18 | 0.99 | 0.33 | 0.27 | 0.84 | 10.93 | Amino acid metabolism                |
| gi348174826 | membrane spanning protein                                               | 2.23 | 2.57 | 2.92 | 1.15 | 1.31 | 1.14 | 10.53 | Cell wall/membrane/septation         |
| gi348176851 | hypothetical protein SspiN1_40985                                       | 1.47 | 0.56 | 0.15 | 0.38 | 0.10 | 0.27 | 10.44 | No classification                    |
| gi348171558 | hypothetical protein SspiN1_13725                                       | 1.79 | 1.14 | 0.40 | 0.64 | 0.23 | 0.35 | 10.11 | No classification                    |
| gi348173043 | CutA1 divalent ion tolerance protein                                    | 0.83 | 0.61 | 0.24 | 0.74 | 0.29 | 0.40 | 10.00 | Resistance protein                   |
| gi348175373 | ferritin family protein                                                 | 2.06 | 2.29 | 3.82 | 1.11 | 1.86 | 1.67 | 8.67  | Iron ion transport                   |
| gi348173142 | secreted protein                                                        | 1.67 | ND   | ND   | ND   | ND   | ND   | 7.94  | Membrane transport                   |
| gi348174322 | hypothetical protein SspiN1_27929                                       | ND   | ND   | ND   | 3.16 | 3.18 | 1.01 | 7.56  | No classification                    |
| gi348170208 | hydrolase                                                               | 1.38 | 1.33 | 1.24 | 0.97 | 0.90 | 0.93 | 7.43  | Amino acid metabolism                |
| gi348176809 | 10 kD chaperonin cpn10                                                  | 0.30 | ND   | ND   | ND   | ND   | ND   | 7.08  | Folding, Sorting and Degradation     |
| gi348170064 | choloylglycine hydrolase                                                | 1.61 | 2.25 | 2.33 | 1.40 | 1.45 | 1.04 | 7.00  | Lipid metabolism                     |
| gi348176725 | hypothetical protein SspiN1_40318                                       | 2.25 | ND   | 2.00 | ND   | 0.89 | ND   | 7.00  | No classification                    |
| gi348169928 | hypothetical protein SspiN1_05293                                       | 2.27 | 1.64 | 1.91 | 0.72 | 0.84 | 1.17 | 6.82  | No classification                    |
| gi348170152 | lysozyme M1 precursor                                                   | 1.73 | 0.16 | ND   | 0.09 | ND   | ND   | 6.52  | Catabolism/proteases                 |
| gi348172470 | hypothetical protein SspiN1_18471                                       | 1.60 | 7.60 | ND   | 4.75 | ND   | ND   | 6.38  | No classification                    |
| gi348170524 | hypothetical protein SspiN1_08400                                       | 0.89 | ND   | 0.13 | ND   | 0.14 | ND   | 6.28  | No classification                    |
| gi348173909 | uroporphyrin-III C/tetrapyrrole (Corrin/Porphyrin) methyltransferase    | 0.35 | ND   | ND   | ND   | ND   | ND   | 6.25  | Metabolism of cofactors and vitamins |
| gi348174563 | cyclic nucleotide-binding domain-containing protein                     | 2.40 | 0.64 | 0.07 | 0.27 | 0.03 | 0.11 | 6.24  | Binding protein/chaperones           |
| gi348170321 | 5-methyltetrahydropteroyltriglutamate--homocysteine S-methyltransferase | 1.89 | 0.74 | 0.58 | 0.39 | 0.31 | 0.78 | 6.18  | Amino acid metabolism                |
| gi348172914 | hypothetical protein SspiN1_20739                                       | 1.25 | ND   | ND   | ND   | ND   | ND   | 6.00  | No classification                    |
| gi348171612 | AhpC/TSA family protein                                                 | 0.60 | 0.14 | ND   | 0.23 | ND   | ND   | 5.80  | Peroxiredoxin                        |
| gi348176468 | 50S ribosomal protein L7/L12                                            | 0.72 | 0.24 | ND   | 0.33 | ND   | ND   | 5.52  | Translation                          |
| gi348175422 | PS1 protein                                                             | 1.50 | 0.28 | 0.11 | 0.19 | 0.07 | 0.39 | 5.52  | Translation                          |
| gi348176887 | oligopeptide binding protein of ABC transporter                         | 1.10 | 0.88 | 0.38 | 0.80 | 0.34 | 0.43 | 5.51  | ABC transporter                      |

|             |                                                              |      |      |      |      |      |      |      |                                          |
|-------------|--------------------------------------------------------------|------|------|------|------|------|------|------|------------------------------------------|
| gi348169435 | secreted protein                                             | 3.37 | ND   | ND   | ND   | ND   | ND   | 5.37 | Membrane transport                       |
| gi348169092 | F0F1 ATP synthase subunit beta                               | 0.80 | 0.17 | 0.17 | 0.22 | 0.21 | 0.97 | 5.33 | Energy metabolism                        |
| gi348169997 | protease                                                     | 1.00 | 0.19 | ND   | 0.19 | ND   | ND   | 5.09 | Catabolism/proteases                     |
| gi348173307 | NmrA family protein                                          | 1.67 | 1.02 | 0.14 | 0.61 | 0.08 | 0.14 | 5.07 | Transcriptional regulator                |
| gi348176208 | luciferase-like protein                                      | 1.86 | 2.11 | 2.25 | 1.13 | 1.21 | 1.07 | 4.93 | Oxidoreductase activity                  |
| gi348174687 | cyclic nucleotide-binding domain-containing protein          | 2.98 | 1.36 | 0.21 | 0.46 | 0.07 | 0.16 | 4.76 | Binding protein /chaperones              |
| gi348172972 | alcohol dehydrogenase zinc-binding domain-containing protein | 0.97 | 0.28 | 0.20 | 0.29 | 0.21 | 0.71 | 4.49 | Carbohydrate metabolism                  |
| gi41350153  | urease alpha subunit                                         | 1.65 | 1.26 | 1.20 | 0.77 | 0.73 | 0.95 | 4.48 | Nucleotide metabolism                    |
| gi348176722 | hypothetical protein SspiN1_40303                            | 1.70 | 0.36 | ND   | 0.21 | ND   | ND   | 4.39 | No classification                        |
| gi348171262 | NAD/factor-dependent formaldehyde dehydrogenase              | 1.14 | 0.67 | 0.48 | 0.58 | 0.42 | 0.72 | 4.37 | Binding protein /chaperones              |
| gi348171298 | stress-like protein                                          | 2.58 | 1.38 | 2.15 | 0.54 | 0.84 | 1.56 | 4.20 | Stress protein                           |
| gi348171177 | heat shock protein Hsp20                                     | ND   | ND   | ND   | 1.83 | 3.04 | 1.66 | 4.15 | Folding, Sorting and Degradation         |
| gi348171500 | dihydrolipoamide dehydrogenase                               | 2.21 | 1.07 | 0.97 | 0.48 | 0.44 | 0.90 | 4.11 | Carbohydrate metabolism                  |
| gi348168994 | protease inhibitor protein                                   | 5.57 | 1.86 | 1.43 | 0.33 | 0.26 | 0.77 | 4.06 | Catabolism /proteases                    |
| gi348174564 | cyclic nucleotide-binding protein                            | 2.02 | 0.59 | 0.04 | 0.29 | 0.02 | 0.07 | 4.03 | Binding protein /chaperones              |
| gi348170525 | hypothetical protein SspiN1_08405                            | 1.36 | 0.91 | ND   | 0.67 | ND   | ND   | 4.00 | No classification                        |
| gi348174019 | glyceraldehyde 3-phosphate dehydrogenase                     | 1.03 | 0.26 | 0.18 | 0.26 | 0.18 | 0.69 | 3.94 | Carbohydrate metabolism                  |
| gi348173305 | aldo/keto reductase                                          | 1.05 | 0.59 | 0.10 | 0.56 | 0.09 | 0.17 | 3.91 | Metabolism of terpenoids and polyketides |
| gi348169336 | hypothetical protein SspiN1_02205                            | 1.08 | 0.62 | ND   | 0.57 | ND   | ND   | 3.89 | No classification                        |
| gi348175040 | fructose-bisphosphate aldolase                               | 0.96 | 0.41 | 0.25 | 0.43 | 0.26 | 0.62 | 3.65 | Carbohydrate metabolism                  |
| gi348174688 | terpene synthase, metal-binding protein                      | 1.80 | 0.67 | 0.08 | 0.37 | 0.04 | 0.12 | 3.62 | Metabolism of terpenoids and polyketides |
| gi348174689 | methyltransferase                                            | 1.62 | 0.10 | ND   | 0.06 | ND   | ND   | 3.59 | Metabolism of terpenoids and polyketides |
| gi348174411 | aldehyde dehydrogenase                                       | 0.83 | 0.26 | 0.32 | 0.31 | 0.39 | 1.23 | 3.49 | Carbohydrate metabolism                  |
| gi348175715 | polyketide biosynthesis enoyl-CoA hydratase                  | 1.26 | 0.12 | ND   | 0.10 | ND   | ND   | 3.48 | Metabolism of terpenoids and polyketides |

|             |                                                |      |      |      |      |      |      |      |                         |
|-------------|------------------------------------------------|------|------|------|------|------|------|------|-------------------------|
| gi348168991 | OsmC family protein                            | 2.10 | ND   | ND   | ND   | ND   | ND   | 3.44 | Stress protein          |
| gi348171389 | ATP-dependent protease Clp, ATPase             | 0.24 | ND   | ND   | ND   | ND   | ND   | 3.40 | Catabolism /proteases   |
| gi348172782 | hypothetical protein SspiN1_20061              | 1.67 | 0.17 | ND   | 0.10 | ND   | ND   | 3.27 | No classification       |
| gi348171813 | ATP-dependent Clp protease proteolytic subunit | 1.24 | 1.03 | 0.88 | 0.83 | 0.71 | 0.85 | 3.26 | Catabolism /proteases   |
| gi348171412 | putative glutamate binding protein             | 2.93 | 2.17 | 1.34 | 0.74 | 0.46 | 0.62 | 3.22 | Transporter             |
| gi348170176 | enoyl-(acyl carrier protein) reductase         | 0.86 | 0.33 | ND   | 0.39 | ND   | ND   | 3.21 | Lipid metabolism        |
| gi348175295 | hypothetical protein SspiN1_32924              | 1.11 | 1.13 | 0.70 | 1.02 | 0.63 | 0.62 | 3.19 | No classification       |
| gi348172504 | luciferase-like protein                        | 1.23 | 0.15 | ND   | 0.12 | ND   | ND   | 3.19 | Oxidoreductase activity |
| gi348175423 | PS1 protein                                    | 1.95 | 0.77 | 0.37 | 0.39 | 0.19 | 0.48 | 3.14 | Translation             |

<sup>a</sup> Averaged PAI ratios from two biological replicates. T2/T1, T3/T1, T4/T1, T3/T2, T4/T2, and T4/T3 represent the six pairs of comparisons of the average PAI for each protein. ND, The protein is not detected in at least one phase.

<sup>b</sup>  $\Sigma$ PAI is the total PAI of two biological replicates during the four phases.

<sup>c</sup> The functions and KEGG pathways of each protein are classified according to their annotated functions in GenBank as well as based on their homology or function, as described in their gene ontology, conserved domains, and KEGG pathways.



**Table S3 Proteins for Spinosad biosynthesis in *S. spinosa***

| Function classification <sup>a</sup> | NCBI NO.    | Gene <sup>b</sup> | Description                                 | Identified peptides <sup>c</sup> |    |    |    |
|--------------------------------------|-------------|-------------------|---------------------------------------------|----------------------------------|----|----|----|
|                                      |             |                   |                                             | T1                               | T2 | T3 | T4 |
| Polyketide biosynthesis              | gi348172135 | <i>spnA</i>       | modular polyketide synthase, partial        | ND                               | ND | ND | 1  |
|                                      | gi13162637  | <i>spnB</i>       | polyketide synthase extender module 2       | 8                                | 11 | ND | ND |
|                                      | gi13162638  | <i>spnC</i>       | polyketide synthase extender modules 3-4    | ND                               | 3  | ND | ND |
|                                      | gi13162634  | <i>spnE</i>       | polyketide synthase extender modules 8-10   | 2                                | 6  | ND | ND |
|                                      | gi348175713 |                   | modular polyketide synthase                 | 3                                | 1  | 1  | ND |
|                                      | gi348174739 |                   | modular polyketide synthase                 | ND                               | ND | 1  | ND |
|                                      | gi348175715 |                   | polyketide biosynthesis enoyl-CoA hydratase | 41                               | 52 | 5  | 1  |
|                                      | gi348173393 |                   | beta-ketoacyl synthase, partial             | ND                               | ND | 1  | ND |
|                                      | gi348173394 |                   | beta-ketoacyl synthase, partial             | ND                               | ND | 1  | ND |
|                                      | gi348175718 |                   | beta-ketoacyl synthase                      | 7                                | 3  | ND | ND |
|                                      | gi348173385 |                   | beta-ketoacyl synthase                      | 1                                | ND | ND | ND |
|                                      | gi348173390 |                   | beta-ketoacyl synthase                      | ND                               | ND | ND | 1  |
|                                      | gi348177040 |                   | beta-ketoacyl synthase                      | ND                               | ND | ND | 1  |
|                                      | gi348175674 |                   | beta keto-acyl synthase                     | ND                               | ND | 1  | ND |
|                                      | gi348174599 |                   | putative acyltransferase                    | 1                                | 1  | 2  | 3  |
|                                      | gi348169131 |                   | putative acyltransferase                    | ND                               | 3  | ND | ND |
|                                      | gi348170219 |                   | aldo/keto reductase family oxidoreductase   | 1                                | ND | ND | ND |
|                                      | gi348169606 |                   | aldo/keto reductase family oxidoreductase   | 1                                | 2  | 3  | 2  |
|                                      | gi348174778 |                   | aldo/keto reductase family oxidoreductase   | ND                               | 1  | ND | ND |

|                         |             |             |                                                        |    |    |    |    |
|-------------------------|-------------|-------------|--------------------------------------------------------|----|----|----|----|
|                         | gi348175336 |             | aldo/keto reductase family oxidoreductase              | ND | ND | 1  | ND |
|                         | gi348173305 |             | aldo/keto reductase                                    | 46 | 48 | 27 | 5  |
|                         | gi348170249 |             | aldo/keto reductase                                    | ND | 1  | ND | ND |
|                         | gi348171622 |             | acyl carrier protein                                   | 10 | 5  | ND | ND |
| Polyketide biosynthesis | gi348175720 |             | polyketide beta-ketoacyl:acyl carrier protein synthase | ND | 3  | 2  | 2  |
|                         | gi348170176 |             | enoyl-(acyl carrier protein) reductase                 | 29 | 25 | 10 | 3  |
|                         | gi348169040 |             | putative 3-hydroxyacyl-CoA dehydrogenase               | 7  | 5  | 3  | 1  |
|                         | gi348171858 |             | thioesterase family protein                            | ND | 1  | ND | ND |
|                         | gi348169563 |             | acyl-CoA thioesterase II                               | ND | 1  | ND | ND |
|                         | gi15077647  | <i>gdh</i>  | DTDP-glucose 4,6-dehydratase                           | ND | 1  | ND | ND |
|                         | gi15077645  | <i>gtt</i>  | putative glucose-1-phosphate thymidyltransferase       | 2  | 4  | ND | ND |
|                         | gi348175864 |             | glycosyl transferase, group 1                          | ND | 2  | ND | ND |
|                         | gi348174384 |             | glycosyl transferase                                   | 1  | ND | ND | ND |
|                         | gi348174443 |             | glycosyl transferase                                   | ND | 14 | 4  | ND |
| Rhamnose biosynthesis   | gi348174728 |             | putative glycosyltransferase                           | 1  | ND | ND | ND |
|                         | gi348175029 |             | transglycosylase family protein                        | 2  | ND | ND | ND |
|                         | gi13162641  | <i>spnH</i> | probable O-methyltransferase                           | 1  | 1  | ND | ND |
|                         | gi13162642  | <i>spnI</i> | probable O-methyltransferase                           | 1  | 6  | 2  | 3  |
|                         | gi13162644  | <i>spnK</i> | probable O-methyltransferase                           | 6  | 11 | 1  | ND |
|                         | gi348171103 |             | SAM-dependent methyltransferase                        | 1  | ND | ND | ND |
|                         | gi348174447 |             | UDP-glucose/GDP-mannose dehydrogenase                  | ND | 4  | ND | ND |

|                         |             |             |                                                 |    |    |    |    |
|-------------------------|-------------|-------------|-------------------------------------------------|----|----|----|----|
|                         | gi348173856 |             | oxidoreductase domain-containing protein        | 1  | ND | ND | ND |
| Forosamine biosynthesis | gi348173408 | <i>spnQ</i> | lipopolysaccharide biosynthesis protein RfbH    | 1  | ND | ND | ND |
|                         | gi13162651  | <i>spnR</i> | probable aminotransferase                       | ND | 1  | ND | ND |
|                         | gi348173410 | <i>spnS</i> | type 11 methyltransferase                       | 1  | 8  | 2  | ND |
|                         | gi348169314 |             | 4-aminobutyrate aminotransferase, PLP-dependent | ND | 3  | 2  | 1  |
|                         |             |             |                                                 |    |    |    |    |
| Polyketide bridging     | gi348173396 | <i>spnF</i> | C5-O-methyltransferase                          | 2  | 2  | ND | ND |
|                         | gi348173400 | <i>spnJ</i> | putative oxidoreductase                         | ND | 2  | 2  | 1  |
|                         | gi13162646  | <i>spnM</i> | SpnM                                            | ND | ND | 1  | ND |
| Other proteins          | gi348174086 |             | type 11 methyltransferase                       | ND | 1  | ND | ND |
|                         | gi348174689 |             | methyltransferase                               | 29 | 47 | 3  | ND |
|                         | gi348174734 |             | O-methyltransferase                             | 4  | ND | ND | ND |
|                         | gi348172815 |             | O-methyltransferase                             | 1  | 2  | 1  | 1  |
|                         | gi348170053 |             | putative methyltransferase                      | ND | 1  | ND | ND |
|                         | gi348168946 |             | methyltransferases-like protein                 | ND | 1  | ND | ND |

<sup>a</sup> The functions of each protein are classified according to their annotated functions in GenBank as well as based on their homology or function, as described in their gene ontology, conserved domains, and KEGG pathways.

<sup>b</sup> Genes have been studied and identified to code corresponding proteins in other researches.

<sup>c</sup> Total number of identified peptides from two biological replicates. ND, The protein is not detected in any phase.

**Table S4 Oligonucleotide primers used in this study**

| Name                      | Sequence (5'-3')                  |
|---------------------------|-----------------------------------|
| <b>(A)PCR primers</b>     |                                   |
| MHSM-F HindIII            | GGGAAGCTTTCAGCGCAGCTCGGCGAT       |
| MHSM-R EcoRI              | CCGGAATTCATGACCAGCAGAATCGGATCTACC |
| GS-F EcoRI                | CCGGAATTCATGTTCAAGAATCCTGACGAGG   |
| GS-R HindIII              | GGGAAGCTTTCACACGTCGAAGTACAGCGA    |
| CNDP-S EcoRI              | CCGGAATTCATGACTGTGACGGATCCGCTCA   |
| CNDP-A HindIII            | GGGAAGCTTTCAGCTCTCCCGCCGAGTT      |
| <b>(B)qRT-PCR primers</b> |                                   |
| RT-MHSM-F                 | GCGTTGAGGTCGTCCAGC                |
| RT-MHSM-R                 | TGCCGAGTCCACCCAGAT                |
| RT-GS-F                   | ATGTCGCTGTGGAAGGACG               |
| RT-GS-R                   | AGGATGCCGCCGATGTAG                |
| RT-CNDP-F                 | CCAGGTCGTGCTCATCGC                |
| RT-CNDP-R                 | GTTCCAGGTGGTCGTTTCG               |
| RT-PSDA-F                 | GAGCCGCCTTCTCCACCT                |
| RT-PSDA-R                 | TGACCACCCGCCAGTTCC                |
| RT-spnK-F                 | CTCCTCGGGCTTGCTCTGG               |
| RT-spnK-R                 | TGTCGGTGGCTACAACCTTCG             |
| RT-16S-F                  | ACCCCTGCCCTATGTTGCC               |
| RT-16S-R                  | CCTTCTCCGAGTTGACCC                |

**Table S5 Enzyme name abbreviations used in this study**

| <b>NCBI Accession</b> | <b>Description</b>                                  | <b>Abbreviations</b> |
|-----------------------|-----------------------------------------------------|----------------------|
| gi348176000           | glucose-6-phosphate isomerase                       | GPI                  |
| gi348175040           | fructose-bisphosphate aldolase                      | FBPA                 |
| gi348174019           | glyceraldehyde 3-phosphate dehydrogenase            | GAPDH                |
| gi348174018           | phosphoglycerate kinase                             | PGK                  |
| gi348174887           | phosphoglycerate mutase                             | PGM                  |
| gi348171500           | dihydrolipoamide dehydrogenase                      | E3                   |
| gi348176767           | succinyl-CoA synthetase subunit beta                | B-SCS                |
| gi348170953           | fumarate hydratase                                  | FHD                  |
| gi348175998           | transketolase                                       | TrK                  |
| gi348176848           | phosphoglucosamine mutase                           | PGM                  |
| gi348174074           | polysaccharide deacetylase                          | PSDA                 |
| gi348170064           | choloylglycine hydrolase                            | CH                   |
| gi348174826           | membrane spanning protein                           | MSP                  |
| gi348176568           | cell wall surface anchor family protein             | CWSA                 |
| gi348173142           | secreted protein                                    | SP-H                 |
| gi348169435           | secreted protein                                    | SP-L                 |
| gi348169513           | putative substrate-binding transport protein        | SBTP                 |
| gi348172844           | dipeptide ABC transporter substrate-binding protein | DSBP                 |
| gi348173080           | sugar ABC transporter periplasmic protein           | STPP                 |
| gi348171106           | ABC-2 type transporter                              | ABC-2                |
| gi348176086           | ABC transporter ATP-binding protein                 | ATP-BP               |

|             |                                                                         |          |
|-------------|-------------------------------------------------------------------------|----------|
| gi348172772 | putative sugar binding secreted protein                                 | SBSP     |
| gi348171412 | putative glutamate binding protein                                      | GBP      |
| gi348171411 | putative glutamate ABC transporter ATP-binding protein                  | G ATP-BP |
| gi348176887 | oligopeptide binding protein of ABC transporter                         | OPBP     |
| gi348175189 | phosphate ABC transporter ATP-binding protein                           | P ATP-BP |
| gi348168950 | putative ABC transport system substrate binding protein                 | SSBP     |
| gi348176682 | ABC transporter substrate-binding protein                               | SBP      |
| gi348170845 | sugar ABC transporter, ATP-binding protein                              | S ATP-BP |
| gi348173178 | superoxide dismutase [Fe-Zn] 1 (FeSOD I)                                | FeSOD I  |
| gi348174946 | superoxide dismutase, copper/zinc binding protein                       | Cu/ZnSOD |
| gi348168941 | putative nickel-containing Superoxide dismutase Precursor               | NiSOD P  |
| gi348175373 | ferritin family protein                                                 | FFP      |
| gi348176208 | luciferase-like protein                                                 | LLP      |
| gi348168991 | OsmC family protein                                                     | OsmC     |
| gi348170321 | 5-methyltetrahydropteroyltriglutamate--homocysteine S-methyltransferase | MHSM     |
| gi348171511 | glutamine synthetase                                                    | GS       |

---
